# Supplementary material for: Network Pharmacology-Based Strategy to Investigate the Pharmacologic Mechanisms of Atractylodes macrocephala Koidz. for the Treatment of Chronic Gastritis
Source: Front Pharmacol. 2020 Jan 29;10:1629. doi: 10.3389/fphar.2019.01629 (PMC7000373; doi:10.3389/fphar.2019.01629)
Supplement: Supplementary file 2 [file Table_2.xls]

## Sheet: Sheet3
Table S2 A total of 27 ingredients were selected as the details of the active ingredients of AMK in this study.xls
No.	Mol ID	CAS No.	Molecule Nmae	OB	DL	Concentration： DW (mg/g) or The relative content = Volatile ingredient / total volatile oil×100%	Reference
1	MOL000050	56-40-6	Glycine	48.74	0	0.70 mg/g	C.-Y. Hu et al. "Nutritional components of wild plant Qibaizhu (Atractylodes macracephala Koidz)," Journal of Biology, 3 (2005).
2	MOL000054	74-79-3	Arginin	47.64	0.03	16.1 mg/g	C.-Y. Hu et al. "Nutritional components of wild plant Qibaizhu (Atractylodes macracephala Koidz)," Journal of Biology, 3 (2005).
3	MOL000056	60-18-4	L-Tyrosine	57.55	0.05	1.60 mg/g	C.-Y. Hu et al. "Nutritional components of wild plant Qibaizhu (Atractylodes macracephala Koidz)," Journal of Biology, 3 (2005).
4	MOL000061	147-85-3	L-Proline	77.57	0.01	2.30 mg/g	C.-Y. Hu et al. "Nutritional components of wild plant Qibaizhu (Atractylodes macracephala Koidz)," Journal of Biology, 3 (2005).
5	MOL000064	302-84-1	DL-Serine	83.59	0.01	1.80 mg/g	C.-Y. Hu et al. "Nutritional components of wild plant Qibaizhu (Atractylodes macracephala Koidz)," Journal of Biology, 3 (2005).
6	MOL000065	6899-03-2	L-aspartic acid	79.74	0.02	5.30 mg/g	C.-Y. Hu et al. "Nutritional components of wild plant Qibaizhu (Atractylodes macracephala Koidz)," Journal of Biology, 3 (2005).
7	MOL000067	7004-03-7	Valine	53.33	0.01	3.60 mg/g	C.-Y. Hu et al. "Nutritional components of wild plant Qibaizhu (Atractylodes macracephala Koidz)," Journal of Biology, 3 (2005).
8	MOL000071	30641-68-0	2-amino-3-(3H-imidazol-4-yl)propanoic acid	53.18	0.03	0.40 mg/g	C.-Y. Hu et al. "Nutritional components of wild plant Qibaizhu (Atractylodes macracephala Koidz)," Journal of Biology, 3 (2005).
9	MOL000042	115967-49-2	(2S)-2-aminopropanoic acid	87.69	0.01	1.60 mg/g	C.-Y. Hu et al. "Nutritional components of wild plant Qibaizhu (Atractylodes macracephala Koidz)," Journal of Biology, 3 (2005).
10	MOL000041	5297-02-9	(2S)-2-amino-3-phenylpropanoic acid	41.62	0.04	0.70 mg/g	C.-Y. Hu et al. "Nutritional components of wild plant Qibaizhu (Atractylodes macracephala Koidz)," Journal of Biology, 3 (2005).
11	MOL000047	473-04-1	juniper camphor	33.3	0.1	0.66 %	LI, Ying. GC-MS analysis of the essential oil components in Atractylodis Macrocephalae Rhizoma and its stir-baked product. Chinese Journal of Pharmaceutical Analysis 33.7 (2013): 1210-1217.
12	MOL000038	260-94-6	Akridin	33.71	0.1	0.31 %	Q. Qiu,et al. Study on the chemical constituents of the volatile oil of atractylodes atractylodes by gc-ms. Chinese Traditional and Herbal Drugs. vol.11, pp.23-24+44, 2002.
13	MOL000025	1493692	α-Longipinene	53.26	0.12	0.15 %	LI, Ying. GC-MS analysis of the essential oil components in Atractylodis Macrocephalae Rhizoma and its stir-baked product. Chinese Journal of Pharmaceutical Analysis 33.7 (2013): 1210-1217.
14	MOL000019	5794-03-6	D-Camphene	34.98	0.04	0.02 %	Zhou J.J., Xie G.R., Yan X.J. Chemical composition of traditional Chinese medicine. Science Press, 2009
15	MOL000018	124-76-5	DL-Isoborneol	86.98	0.05	6.71 %	X. D, Li. et al. Extraction process of the essential oil from Zingiber officinale Rosc. and Atractylodes macrocephala Koidz. Journal of Shenyang Pharmaceutical University 1 (2003).
16	MOL000022	113269-36-6	14-acetyl-12-senecioyl-2E,8Z,10E-atractylentriol	63.37	0.3	Identified	Yao, C.M., Yang, X.W. Bioactivity-guided isolation of polyacetylenes with inhibitory activity against NO production in LPS-activated RAW264.7 macrophages from the rhizomes of Atractylodes macrocephala. Ethnopharmacol. vol. 151, pp. 791–799, 2014.
17	MOL000030	103729-80-2	(±)-2-methyl-1-phenylprop-2-en-1-ol	75.1	0.03	Identified	Zhou J.J., Xie G.R., Yan X.J. Chemical composition of traditional Chinese medicine. Science Press, 2009
18	MOL000072	113269-35-5	8β-ethoxy atractylenolide III	35.95	0.21	Identified	Z.-L. Chen, "The acetylenes from Atractylodes macrocephala," Planta Medica, vol. 53, no. 5, pp. 493–494, 1987.
19	MOL000048	19912-61-9	furanodiene	43.17	0.1	0.314 %	Q. Zhang, Z. W. Li. Studies on chemical constituents of the essential of Atractylodes macrocephala Koidz. West china journal of pharmaceutical sciences.1997,2.
20	MOL000023	5989-27-5	Limonene	39.84	0.02	0.007 %	Zheng J. Analysis on Chemical Constituents of Essential Oils from Different Varieties of Atractylodes macrocephala by GC-MS. China Pharmacy 31 (2007).
21	MOL000033	64997-52-0	Beta-sitosterol	36.23	0.78	Identified	Sun, Xue, et al. "Influence of sulfur fumigation on the chemical profiles of Atractylodes macrocephala Koidz. evaluated by UFLC–QTOF–MS combined with multivariate statistical analysis." Journal of pharmaceutical and biomedical analysis 141 (2017): 19-31.
22	MOL000066	25246-27-9	Alloaromadendrene	53.46	0.1	0.039 %	Zheng J. Analysis on Chemical Constituents of Essential Oils from Different Varieties of Atractylodes macrocephala by GC-MS. China Pharmacy 31 (2007).
23	MOL000057	84-69-5	DIBP	49.63	0.13	Identified	Wang Y, Zhang N, Dou D. Chemical Constituents of Atractylodes Macrocephala from Yuqian. Journal of Liaoning University of Traditional Chinese Medicine. vol.7, pp.18, 2015.
24	MOL000060	54707-47-0	selina-4(14),7(11)-dien-8-one	32.31	0.1	Identified	Sun, Xue, et al. "Influence of sulfur fumigation on the chemical profiles of Atractylodes macrocephala Koidz. evaluated by UFLC–QTOF–MS combined with multivariate statistical analysis." Journal of pharmaceutical and biomedical analysis 141 (2017): 19-31.
25	MOL000043	73069-13-3	atractylenolide I	37.37	0.15	0.375 mg/g	Y.-H. Meng et al. "Determination of Atractylone and other four effective components in Atractylodes macrocephala and its processed products by HPLC," Chemical Engineer, vol. 33, no. 08 pp.24-26, 2019.
26	MOL000046	6989-21-5	atractylone	41.1	0.13	46.05 %	LI, Ying. "GC-MS analysis of the essential oil components in Atractylodis Macrocephalae Rhizoma and its stir-baked product," Chinese Journal of Pharmaceutical Analysis, vol .33 no.7 pp. 1210-1217, 2013.
27	MOL000049	61206-10-8	3β-acetoxyatractylone	54.07	0.22	Identified	Shan, Guo-Shun, et al. "Metabolomic study of raw and processed Atractylodes macrocephala Koidz by LC–MS." Journal of pharmaceutical and biomedical analysis 98 (2014): 74-84.
