# Supplementary material for: Network Pharmacology-Based Strategy to Investigate the Pharmacologic Mechanisms of Atractylodes macrocephala Koidz. for the Treatment of Chronic Gastritis
Source: Front Pharmacol. 2020 Jan 29;10:1629. doi: 10.3389/fphar.2019.01629 (PMC7000373; doi:10.3389/fphar.2019.01629)
Supplement: Supplementary file 5 [file Table_5.xls]

## Sheet: Sheet1
Table S5: Detailed information between the active ingredients and the gene symbols
Drug	Ingredient	Mol ID	Target	Disease
Atractylodes Macrocephala Koidz.	D-Camphene	MOL000019	PTGS2	Chronic Gastritis
	alloaromadedrene	MOL000066	CHRM3
	3β-acetoxyatractylone	MOL000049	CHRM3/AR/PTGS2
	α-Longipinene	MOL000025	PTGS2/CHRM3
	Akridin	MOL000038	PTGS1/PTGS2
	atractylenolide I	MOL000043	VEGFA/IL6/IL1B
	(5E,9Z)-3,6,10-trimethyl-4,7,8,11-tetrahydrocyclodeca[b]furan	MOL000048	CHRM3/AR/PTGS2/SLC6A4
	(1R)-2-methyl-1-phenylprop-2-en-1-ol	MOL000030	CHRM3
	14-acetyl-12-senecioyl-2E,8Z,10E-atractylentriol	MOL000022	PTGS2
	Istidina	MOL000071	PTGS1/PTGS2
	atractylone	MOL000046	CHRM3
	ASI	MOL000065	ADH1B/ALOX5/ARG1/GLUD1
	selina-4(14),7(11)-dien-8-one	MOL000060	PTGS2/CHRM3
	Prolinum	MOL000061	LYZ/PTGS2/ADH1B
	(+/-)-Isoborneol	MOL000018	PGR/PTGS2/CHRM3
	LPG	MOL000042	LDHB/MMP8/PTGS1/ADH1B/ARG1/CAT/F13A1/CTH/GPI/GPT/MMP12
	L-Valin	MOL000067	PTGS1/PTGS2/CTH
	L-	MOL000054	PTGS2
	8β-ethoxy atractylenolide III	MOL000072	PTGS2
	juniper camphor	MOL000047	PTGS2/CHRM3
	PHA	MOL000041	LYZ/PTGS1/PTGS2
	Hemo-sol	MOL000023	PTGS2/ADH1B
	DTY	MOL000056	PTGS1/PTGS2
	GLY	MOL000050	LDHB/LTF/MMP12/MMP8/MTR/PTGS1/PTGS2/ADH1B/ALDH2/ARG1/CAT/F13A1/CTH/GPI/GPT/GLUD1
	DIBP	MOL000057	CHRM3/PGR/SLC6A4
	(3S,8S,9S,10R,13R,14S,17R)-10,13-dimethyl-17-[(2R,5S)-5-propan-2-yloctan-2-yl]-2,3,4,7,8,9,11,12,14,15,16,17-dodecahydro-1H-cyclopenta[a]phenanthren-3-ol	MOL000033	PGR
	D-Serin	MOL000064	GPT/CTH/PTGS1/ADH1B
