# Supplementary material for: Network Pharmacology-Based Strategy to Investigate the Pharmacologic Mechanisms of Atractylodes macrocephala Koidz. for the Treatment of Chronic Gastritis
Source: Front Pharmacol. 2020 Jan 29;10:1629. doi: 10.3389/fphar.2019.01629 (PMC7000373; doi:10.3389/fphar.2019.01629)
Supplement: Supplementary file 6 [file Table_6.xlsx]

## Sheet: string_interactions
Table S6: The details of the PPI network
#node1	node2	node1_string_internal_id	node2_string_internal_id	node1_external_id	node2_external_id	neighborhood_on_chromosome	gene_fusion	phylogenetic_cooccurrence	homology	coexpression	experimentally_determined_interaction	database_annotated	automated_textmining	combined_score
ADH1B	ALDH2	4438237	4434937	9606.ENSP00000306606	9606.ENSP00000261733	0.048	0	0	0	0.14	0	0.9	0.924	0.993
IL6	IL1B	4447254	4435241	9606.ENSP00000385675	9606.ENSP00000263341	0	0	0	0	0.43	0	0	0.973	0.984
CTH	MTR	4443637	4442697	9606.ENSP00000359976	9606.ENSP00000355536	0.184	0	0	0	0.064	0	0.9	0.767	0.979
ALOX5	PTGS2	4444382	4442894	9606.ENSP00000363512	9606.ENSP00000356438	0	0	0	0	0.08	0	0.9	0.758	0.975
PTGS2	IL1B	4442894	4435241	9606.ENSP00000356438	9606.ENSP00000263341	0	0	0	0	0.561	0	0	0.943	0.974
ALOX5	PTGS1	4444382	4442503	9606.ENSP00000363512	9606.ENSP00000354612	0	0	0	0	0.095	0	0.9	0.728	0.973
LYZ	LTF	4434847	4433548	9606.ENSP00000261267	9606.ENSP00000231751	0	0	0	0	0.127	0.379	0.9	0.575	0.973
GPI	LDHB	4448366	4446501	9606.ENSP00000405573	9606.ENSP00000379386	0.075	0	0	0	0.165	0	0.8	0.797	0.964
ALDH2	CAT	4434937	4433793	9606.ENSP00000261733	9606.ENSP00000241052	0	0	0	0	0.124	0.05	0.9	0.574	0.959
VEGFA	IL6	4451310	4447254	9606.ENSP00000478570	9606.ENSP00000385675	0	0	0	0	0.063	0	0	0.957	0.959
GPT	GLUD1	4446354	4436266	9606.ENSP00000378408	9606.ENSP00000277865	0.059	0	0	0	0.09	0	0.9	0.511	0.952
ARG1	MMP8	4441926	4433667	9606.ENSP00000349446	9606.ENSP00000236826	0	0	0	0	0.142	0	0.9	0.47	0.95
MMP8	LTF	4433667	4433548	9606.ENSP00000236826	9606.ENSP00000231751	0	0	0	0	0.183	0	0.9	0.429	0.949
IL6	PTGS2	4447254	4442894	9606.ENSP00000385675	9606.ENSP00000356438	0	0	0	0	0.314	0	0	0.922	0.945
VEGFA	F13A1	4451310	4435508	9606.ENSP00000478570	9606.ENSP00000264870	0	0	0	0	0	0	0.9	0.466	0.944
LYZ	MMP8	4434847	4433667	9606.ENSP00000261267	9606.ENSP00000236826	0	0	0	0	0.116	0	0.9	0.325	0.935
ARG1	LYZ	4441926	4434847	9606.ENSP00000349446	9606.ENSP00000261267	0	0	0	0	0.08	0	0.9	0.197	0.919
AR	PGR	4444436	4439740	9606.ENSP00000363822	9606.ENSP00000325120	0	0	0	0.813	0.069	0	0.9	0.904	0.919
VEGFA	PTGS2	4451310	4442894	9606.ENSP00000478570	9606.ENSP00000356438	0	0	0	0	0.082	0	0	0.914	0.918
ARG1	LTF	4441926	4433548	9606.ENSP00000349446	9606.ENSP00000231751	0	0	0	0	0.096	0	0.9	0.125	0.914
PTGS2	PTGS1	4442894	4442503	9606.ENSP00000356438	9606.ENSP00000354612	0	0	0.432	0.967	0.14	0.379	0.8	0.956	0.889
VEGFA	IL1B	4451310	4435241	9606.ENSP00000478570	9606.ENSP00000263341	0	0	0	0	0	0	0	0.877	0.877
GPT	CAT	4446354	4433793	9606.ENSP00000378408	9606.ENSP00000241052	0	0	0	0	0.063	0	0	0.851	0.855
LDHB	CTH	4446501	4443637	9606.ENSP00000379386	9606.ENSP00000359976	0	0	0	0	0.063	0	0.8	0.129	0.822
IL6	AR	4447254	4444436	9606.ENSP00000385675	9606.ENSP00000363822	0	0	0	0	0	0	0	0.787	0.787
GLUD1	ALDH2	4436266	4434937	9606.ENSP00000277865	9606.ENSP00000261733	0.049	0	0	0	0.099	0.164	0.6	0.319	0.769
PTGS1	IL1B	4442503	4435241	9606.ENSP00000354612	9606.ENSP00000263341	0	0	0	0	0.156	0	0	0.723	0.756
VEGFA	AR	4451310	4444436	9606.ENSP00000478570	9606.ENSP00000363822	0	0	0	0	0	0	0	0.742	0.742
IL6	CAT	4447254	4433793	9606.ENSP00000385675	9606.ENSP00000241052	0	0	0	0	0	0	0	0.735	0.735
IL6	GPT	4447254	4446354	9606.ENSP00000385675	9606.ENSP00000378408	0	0	0	0	0	0	0	0.733	0.733
PTGS2	CAT	4442894	4433793	9606.ENSP00000356438	9606.ENSP00000241052	0	0	0	0	0	0.131	0	0.685	0.715
IL6	ARG1	4447254	4441926	9606.ENSP00000385675	9606.ENSP00000349446	0	0	0	0	0.051	0	0	0.704	0.707
PTGS2	ARG1	4442894	4441926	9606.ENSP00000356438	9606.ENSP00000349446	0	0	0	0	0	0	0	0.705	0.705
GPI	GLUD1	4448366	4436266	9606.ENSP00000405573	9606.ENSP00000277865	0.111	0	0	0	0.129	0.128	0	0.596	0.691
LDHB	CAT	4446501	4433793	9606.ENSP00000379386	9606.ENSP00000241052	0	0	0	0	0.064	0.368	0	0.502	0.68
IL1B	CAT	4435241	4433793	9606.ENSP00000263341	9606.ENSP00000241052	0	0	0	0	0	0	0	0.669	0.669
VEGFA	ALOX5	4451310	4444382	9606.ENSP00000478570	9606.ENSP00000363512	0	0	0	0	0	0	0	0.658	0.658
IL6	MMP8	4447254	4433667	9606.ENSP00000385675	9606.ENSP00000236826	0	0	0	0	0.061	0	0	0.629	0.636
GPT	IL1B	4446354	4435241	9606.ENSP00000378408	9606.ENSP00000263341	0	0	0	0	0	0	0	0.635	0.635
VEGFA	PGR	4451310	4439740	9606.ENSP00000478570	9606.ENSP00000325120	0	0	0	0	0	0	0	0.63	0.63
IL1B	MMP8	4435241	4433667	9606.ENSP00000263341	9606.ENSP00000236826	0	0	0	0	0.127	0	0	0.579	0.617
IL1B	SLC6A4	4435241	4434929	9606.ENSP00000263341	9606.ENSP00000261707	0	0	0	0	0	0	0	0.61	0.61
ARG1	IL1B	4441926	4435241	9606.ENSP00000349446	9606.ENSP00000263341	0	0	0	0	0.062	0	0	0.583	0.593
LDHB	ALDH2	4446501	4434937	9606.ENSP00000379386	9606.ENSP00000261733	0.044	0	0	0	0.062	0.432	0	0.29	0.591
PTGS2	PGR	4442894	4439740	9606.ENSP00000356438	9606.ENSP00000325120	0	0	0	0	0.061	0.05	0	0.573	0.585
VEGFA	CAT	4451310	4433793	9606.ENSP00000478570	9606.ENSP00000241052	0	0	0	0	0	0	0	0.579	0.579
MMP12	IL6	4450601	4447254	9606.ENSP00000458585	9606.ENSP00000385675	0	0	0	0	0.09	0	0	0.551	0.574
CTH	CAT	4443637	4433793	9606.ENSP00000359976	9606.ENSP00000241052	0	0	0	0	0.097	0	0	0.541	0.568
IL6	ALOX5	4447254	4444382	9606.ENSP00000385675	9606.ENSP00000363512	0	0	0	0	0	0	0	0.563	0.563
VEGFA	ARG1	4451310	4441926	9606.ENSP00000478570	9606.ENSP00000349446	0	0	0	0	0	0	0	0.559	0.559
LDHB	GPT	4446501	4446354	9606.ENSP00000379386	9606.ENSP00000378408	0.051	0	0	0	0.062	0	0	0.542	0.557
IL6	PTGS1	4447254	4442503	9606.ENSP00000385675	9606.ENSP00000354612	0	0	0	0	0.094	0	0	0.53	0.556
PGR	IL1B	4439740	4435241	9606.ENSP00000325120	9606.ENSP00000263341	0	0	0	0	0	0	0	0.543	0.543
GPI	GPT	4448366	4446354	9606.ENSP00000405573	9606.ENSP00000378408	0.044	0	0	0	0.129	0	0	0.492	0.54
VEGFA	MMP8	4451310	4433667	9606.ENSP00000478570	9606.ENSP00000236826	0	0	0	0	0	0	0	0.534	0.534
VEGFA	GPT	4451310	4446354	9606.ENSP00000478570	9606.ENSP00000378408	0	0	0	0	0	0	0	0.528	0.528
VEGFA	MMP12	4451310	4450601	9606.ENSP00000478570	9606.ENSP00000458585	0	0	0	0	0	0	0	0.526	0.526
GPT	PTGS2	4446354	4442894	9606.ENSP00000378408	9606.ENSP00000356438	0	0	0	0	0.063	0	0	0.511	0.522
MMP12	IL1B	4450601	4435241	9606.ENSP00000458585	9606.ENSP00000263341	0	0	0	0	0.126	0	0	0.473	0.52
PTGS2	MMP8	4442894	4433667	9606.ENSP00000356438	9606.ENSP00000236826	0	0	0	0	0.076	0	0	0.499	0.517
LDHB	GLUD1	4446501	4436266	9606.ENSP00000379386	9606.ENSP00000277865	0.049	0	0	0	0.088	0	0	0.483	0.512
ALOX5	IL1B	4444382	4435241	9606.ENSP00000363512	9606.ENSP00000263341	0	0	0	0	0.098	0	0	0.477	0.508
GPT	CTH	4446354	4443637	9606.ENSP00000378408	9606.ENSP00000359976	0	0	0	0	0.109	0	0	0.456	0.494
MMP12	ARG1	4450601	4441926	9606.ENSP00000458585	9606.ENSP00000349446	0	0	0	0	0	0	0	0.483	0.483
PTGS1	CAT	4442503	4433793	9606.ENSP00000354612	9606.ENSP00000241052	0	0	0	0	0.065	0.131	0	0.403	0.472
LDHB	ADH1B	4446501	4438237	9606.ENSP00000379386	9606.ENSP00000306606	0	0	0	0	0.063	0	0	0.456	0.468
GPI	CAT	4448366	4433793	9606.ENSP00000405573	9606.ENSP00000241052	0	0	0	0	0.049	0	0	0.459	0.463
ARG1	CAT	4441926	4433793	9606.ENSP00000349446	9606.ENSP00000241052	0	0	0	0	0.062	0.057	0	0.422	0.444
IL6	PGR	4447254	4439740	9606.ENSP00000385675	9606.ENSP00000325120	0	0	0	0	0.062	0	0	0.43	0.442
VEGFA	PTGS1	4451310	4442503	9606.ENSP00000478570	9606.ENSP00000354612	0	0	0	0	0.063	0	0	0.429	0.442
AR	PTGS2	4444436	4442894	9606.ENSP00000363822	9606.ENSP00000356438	0	0	0	0	0	0.05	0	0.437	0.442
GLUD1	CAT	4436266	4433793	9606.ENSP00000277865	9606.ENSP00000241052	0	0	0	0	0.11	0	0	0.381	0.425
ALDH2	SLC6A4	4434937	4434929	9606.ENSP00000261733	9606.ENSP00000261707	0	0	0	0	0	0	0	0.42	0.42
IL6	SLC6A4	4447254	4434929	9606.ENSP00000385675	9606.ENSP00000261707	0	0	0	0	0	0	0	0.419	0.418
IL1B	LYZ	4435241	4434847	9606.ENSP00000263341	9606.ENSP00000261267	0	0	0	0	0.13	0	0	0.354	0.414
ADH1B	SLC6A4	4438237	4434929	9606.ENSP00000306606	9606.ENSP00000261707	0	0	0	0	0	0	0	0.411	0.41
ADH1B	CAT	4438237	4433793	9606.ENSP00000306606	9606.ENSP00000241052	0	0	0	0	0.061	0	0	0.387	0.4
