# Supplementary material for: Network Pharmacology-Based Strategy to Investigate the Pharmacologic Mechanisms of Atractylodes macrocephala Koidz. for the Treatment of Chronic Gastritis
Source: Front Pharmacol. 2020 Jan 29;10:1629. doi: 10.3389/fphar.2019.01629 (PMC7000373; doi:10.3389/fphar.2019.01629)
Supplement: Supplementary file 7 [file Table_7.xls]

## Sheet: Sheet1
Table S7: The details of the GO analysis
ONTOLOGY	ID	Description	GeneRatio	BgRatio	pvalue	p.adjust	qvalue	geneID	Count
BP	GO:0046394	carboxylic acid biosynthetic process	2019-09-25	412/18493	1.84656e-09	1.49575e-06	6.99879e-07	PTGS2/PTGS1/GPT/CTH/GPI/IL1B/MTR/GLUD1/ALOX5	9
BP	GO:0016053	organic acid biosynthetic process	2019-09-25	413/18493	1.8862e-09	1.49575e-06	6.99879e-07	PTGS2/PTGS1/GPT/CTH/GPI/IL1B/MTR/GLUD1/ALOX5	9
BP	GO:0051091	positive regulation of DNA binding transcription factor activity	2019-07-25	255/18493	3.39492e-08	1.79478e-05	8.39796e-06	CAT/CTH/VEGFA/IL6/IL1B/AR/LTF	7
BP	GO:0002446	neutrophil mediated immunity	2019-08-25	499/18493	1.91836e-07	7.60629e-05	3.55906e-05	LYZ/MMP8/ARG1/CAT/GPI/IL6/LTF/ALOX5	8
BP	GO:0044706	multi-multicellular organism process	2019-06-25	221/18493	3.98668e-07	0.000126457	5.91707e-05	PTGS2/PGR/ARG1/IL1B/SLC6A4/AR	6
BP	GO:0051222	positive regulation of protein transport	2019-07-25	402/18493	7.46237e-07	0.000155039	7.25441e-05	PTGS2/MMP8/MMP12/GPI/IL6/IL1B/GLUD1	7
BP	GO:0051047	positive regulation of secretion	2019-07-25	404/18493	7.71484e-07	0.000155039	7.25441e-05	MMP8/MMP12/GPI/IL6/IL1B/SLC6A4/GLUD1	7
BP	GO:0150078	positive regulation of neuroinflammatory response	2019-03-25	14/18493	7.86619e-07	0.000155039	7.25441e-05	MMP8/IL6/IL1B	3
BP	GO:0051090	regulation of DNA binding transcription factor activity	2019-07-25	412/18493	8.7979e-07	0.000155039	7.25441e-05	CAT/CTH/VEGFA/IL6/IL1B/AR/LTF	7
BP	GO:0031349	positive regulation of defense response	2019-07-25	427/18493	1.1175e-06	0.000163418	7.64648e-05	PTGS2/MMP8/MMP12/ARG1/IL6/IL1B/LTF	7
BP	GO:0060135	maternal process involved in female pregnancy	2019-04-25	60/18493	1.20336e-06	0.000163418	7.64648e-05	PTGS2/PGR/ARG1/AR	4
BP	GO:1904951	positive regulation of establishment of protein localization	2019-07-25	437/18493	1.30425e-06	0.000163418	7.64648e-05	PTGS2/MMP8/MMP12/GPI/IL6/IL1B/GLUD1	7
BP	GO:0051092	positive regulation of NF-kappaB transcription factor activity	2019-05-25	146/18493	1.33949e-06	0.000163418	7.64648e-05	CAT/CTH/IL1B/AR/LTF	5
BP	GO:0032103	positive regulation of response to external stimulus	2019-06-25	297/18493	2.23435e-06	0.00025312	0.000118437	PTGS2/MMP8/ARG1/VEGFA/IL6/IL1B	6
BP	GO:0043312	neutrophil degranulation	2019-07-25	485/18493	2.60749e-06	0.000266474	0.000124686	LYZ/MMP8/ARG1/CAT/GPI/LTF/ALOX5	7
BP	GO:0002283	neutrophil activation involved in immune response	2019-07-25	488/18493	2.71618e-06	0.000266474	0.000124686	LYZ/MMP8/ARG1/CAT/GPI/LTF/ALOX5	7
BP	GO:0035743	CD4-positive, alpha-beta T cell cytokine production	2019-03-25	21/18493	2.85628e-06	0.000266474	0.000124686	ARG1/IL6/IL1B	3
BP	GO:0042119	neutrophil activation	2019-07-25	498/18493	3.10627e-06	0.000273697	0.000128066	LYZ/MMP8/ARG1/CAT/GPI/LTF/ALOX5	7
BP	GO:0008652	cellular amino acid biosynthetic process	2019-04-25	85/18493	4.88432e-06	0.000378338	0.000177028	GPT/CTH/MTR/GLUD1	4
BP	GO:0150077	regulation of neuroinflammatory response	2019-03-25	25/18493	4.92183e-06	0.000378338	0.000177028	MMP8/IL6/IL1B	3
BP	GO:0007565	female pregnancy	2019-05-25	191/18493	5.00952e-06	0.000378338	0.000177028	PTGS2/PGR/ARG1/IL1B/AR	5
BP	GO:0035690	cellular response to drug	2019-06-25	355/18493	6.24031e-06	0.000423733	0.000198269	CHRM3/PTGS2/ARG1/IL6/IL1B/MTR	6
BP	GO:0002724	regulation of T cell cytokine production	2019-03-25	27/18493	6.24812e-06	0.000423733	0.000198269	ARG1/IL6/IL1B	3
BP	GO:2000117	negative regulation of cysteine-type endopeptidase activity	2019-04-25	91/18493	6.41211e-06	0.000423733	0.000198269	PTGS2/GPI/VEGFA/LTF	4
BP	GO:0002675	positive regulation of acute inflammatory response	2019-03-25	28/18493	6.99166e-06	0.000443551	0.000207542	PTGS2/IL6/IL1B	3
BP	GO:1903532	positive regulation of secretion by cell	2019-06-25	373/18493	8.27989e-06	0.000505073	0.000236329	MMP8/MMP12/GPI/IL6/SLC6A4/GLUD1	6
BP	GO:0007584	response to nutrient	2019-05-25	216/18493	9.11462e-06	0.0005354	0.000250519	PTGS2/ARG1/CAT/IL1B/SLC6A4	5
BP	GO:0042136	neurotransmitter biosynthetic process	2019-04-25	102/18493	1.00938e-05	0.000546127	0.000255538	PTGS2/MMP8/IL1B/SLC6A4	4
BP	GO:0010574	regulation of vascular endothelial growth factor production	2019-03-25	32/18493	1.05479e-05	0.000546127	0.000255538	PTGS2/IL6/IL1B	3
BP	GO:1901605	alpha-amino acid metabolic process	2019-05-25	223/18493	1.06385e-05	0.000546127	0.000255538	ARG1/GPT/CTH/MTR/GLUD1	5
BP	GO:0048545	response to steroid hormone	2019-06-25	390/18493	1.06746e-05	0.000546127	0.000255538	PTGS2/PGR/ARG1/GPI/IL6/AR	6
BP	GO:0032963	collagen metabolic process	2019-04-25	106/18493	1.17567e-05	0.00058269	0.000272646	MMP8/MMP12/ARG1/IL6	4
BP	GO:0010573	vascular endothelial growth factor production	2019-03-25	34/18493	1.27029e-05	0.000610509	0.000285663	PTGS2/IL6/IL1B	3
BP	GO:0097237	cellular response to toxic substance	2019-05-25	235/18493	1.37083e-05	0.00063945	0.000299205	PTGS2/PTGS1/ARG1/CAT/IL6	5
BP	GO:0002369	T cell cytokine production	2019-03-25	37/18493	1.64501e-05	0.000745426	0.000348792	ARG1/IL6/IL1B	3
BP	GO:0050714	positive regulation of protein secretion	2019-05-25	246/18493	1.70933e-05	0.000753057	0.000352363	MMP8/MMP12/GPI/IL6/GLUD1	5
BP	GO:0009063	cellular amino acid catabolic process	2019-04-25	118/18493	1.79639e-05	0.000770021	0.000360301	ARG1/GPT/CTH/GLUD1	4
BP	GO:0044282	small molecule catabolic process	2019-06-25	431/18493	1.88174e-05	0.000785378	0.000367486	ARG1/GPT/CTH/GPI/ALDH2/GLUD1	6
BP	GO:0050708	regulation of protein secretion	2019-06-25	438/18493	2.06097e-05	0.000838129	0.000392169	MMP8/MMP12/GPI/IL6/IL1B/GLUD1	6
BP	GO:0006979	response to oxidative stress	2019-06-25	441/18493	2.1419e-05	0.000849262	0.000397378	PTGS2/PTGS1/ARG1/CAT/IL6/MTR	6
BP	GO:0032355	response to estradiol	2019-04-25	127/18493	2.39954e-05	0.000881116	0.000412283	PTGS2/CAT/GPI/SLC6A4	4
BP	GO:0045429	positive regulation of nitric oxide biosynthetic process	2019-03-25	42/18493	2.41965e-05	0.000881116	0.000412283	PTGS2/MMP8/IL1B	3
BP	GO:1904407	positive regulation of nitric oxide metabolic process	2019-03-25	42/18493	2.41965e-05	0.000881116	0.000412283	PTGS2/MMP8/IL1B	3
BP	GO:0002793	positive regulation of peptide secretion	2019-05-25	265/18493	2.44446e-05	0.000881116	0.000412283	MMP8/MMP12/GPI/IL6/GLUD1	5
BP	GO:0002700	regulation of production of molecular mediator of immune response	2019-04-25	133/18493	2.87668e-05	0.000973996	0.000455742	ARG1/GPI/IL6/IL1B	4
BP	GO:0050729	positive regulation of inflammatory response	2019-04-25	133/18493	2.87668e-05	0.000973996	0.000455742	PTGS2/MMP8/IL6/IL1B	4
BP	GO:0002791	regulation of peptide secretion	2019-06-25	465/18493	2.88637e-05	0.000973996	0.000455742	MMP8/MMP12/GPI/IL6/IL1B/GLUD1	6
BP	GO:0048871	multicellular organismal homeostasis	2019-06-25	471/18493	3.10179e-05	0.00102488	0.000479554	PTGS2/LYZ/VEGFA/IL6/IL1B/LTF	6
BP	GO:0060443	mammary gland morphogenesis	2019-03-25	46/18493	3.18811e-05	0.00103191	0.000482839	PGR/ARG1/AR	3
BP	GO:0006953	acute-phase response	2019-03-25	47/18493	3.40244e-05	0.00105809	0.000495092	PTGS2/IL6/IL1B	3
BP	GO:0150076	neuroinflammatory response	2019-03-25	47/18493	3.40244e-05	0.00105809	0.000495092	MMP8/IL6/IL1B	3
BP	GO:0030879	mammary gland development	2019-04-25	141/18493	3.61685e-05	0.00110314	0.00051617	PGR/ARG1/VEGFA/AR	4
BP	GO:0046456	icosanoid biosynthetic process	2019-03-25	49/18493	3.85907e-05	0.00115481	0.000540346	PTGS2/PTGS1/ALOX5	3
BP	GO:0042133	neurotransmitter metabolic process	2019-04-25	148/18493	4.37143e-05	0.00128391	0.000600752	PTGS2/MMP8/IL1B/SLC6A4	4
BP	GO:1903428	positive regulation of reactive oxygen species biosynthetic process	2019-03-25	55/18493	5.46582e-05	0.00155597	0.000728055	PTGS2/MMP8/IL1B	3
BP	GO:0001666	response to hypoxia	2019-05-25	314/18493	5.49397e-05	0.00155597	0.000728055	PTGS2/MMP12/CAT/VEGFA/SLC6A4	5
BP	GO:0001960	negative regulation of cytokine-mediated signaling pathway	2019-03-25	56/18493	5.77006e-05	0.00160549	0.000751226	MMP12/ARG1/IL6	3
BP	GO:0006520	cellular amino acid metabolic process	2019-05-25	324/18493	6.37461e-05	0.0017098	0.000800031	ARG1/GPT/CTH/MTR/GLUD1	5
BP	GO:0032496	response to lipopolysaccharide	2019-05-25	324/18493	6.37461e-05	0.0017098	0.000800031	PTGS2/ARG1/IL6/IL1B/LTF	5
BP	GO:0036293	response to decreased oxygen levels	2019-05-25	325/18493	6.46834e-05	0.0017098	0.000800031	PTGS2/MMP12/CAT/VEGFA/SLC6A4	5
BP	GO:0060761	negative regulation of response to cytokine stimulus	2019-03-25	60/18493	7.0977e-05	0.0018293	0.000855948	MMP12/ARG1/IL6	3
BP	GO:0001101	response to acid chemical	2019-05-25	332/18493	7.1547e-05	0.0018293	0.000855948	PTGS2/ARG1/CAT/VEGFA/SLC6A4	5
BP	GO:0031640	killing of cells of other organism	2019-03-25	61/18493	7.45816e-05	0.0018293	0.000855948	LYZ/ARG1/LTF	3
BP	GO:0044364	disruption of cells of other organism	2019-03-25	61/18493	7.45816e-05	0.0018293	0.000855948	LYZ/ARG1/LTF	3
BP	GO:0002237	response to molecule of bacterial origin	2019-05-25	337/18493	7.67849e-05	0.0018293	0.000855948	PTGS2/ARG1/IL6/IL1B/LTF	5
BP	GO:0045428	regulation of nitric oxide biosynthetic process	2019-03-25	62/18493	7.8304e-05	0.0018293	0.000855948	PTGS2/MMP8/IL1B	3
BP	GO:0001660	fever generation	2019-02-25	10/18493	7.84316e-05	0.0018293	0.000855948	PTGS2/IL1B	2
BP	GO:2000551	regulation of T-helper 2 cell cytokine production	2019-02-25	10/18493	7.84316e-05	0.0018293	0.000855948	ARG1/IL6	2
BP	GO:0046686	response to cadmium ion	2019-03-25	63/18493	8.21459e-05	0.00188817	0.000883492	ARG1/CAT/GPI	3
BP	GO:0070482	response to oxygen levels	2019-05-25	349/18493	9.05669e-05	0.00202546	0.000947731	PTGS2/MMP12/CAT/VEGFA/SLC6A4	5
BP	GO:0002709	regulation of T cell mediated immunity	2019-03-25	66/18493	9.44059e-05	0.00202546	0.000947731	ARG1/IL6/IL1B	3
BP	GO:0019371	cyclooxygenase pathway	2019-02-25	11/18493	9.57814e-05	0.00202546	0.000947731	PTGS2/PTGS1	2
BP	GO:0031652	positive regulation of heat generation	2019-02-25	11/18493	9.57814e-05	0.00202546	0.000947731	PTGS2/IL1B	2
BP	GO:0033197	response to vitamin E	2019-02-25	11/18493	9.57814e-05	0.00202546	0.000947731	ARG1/CAT	2
BP	GO:0051024	positive regulation of immunoglobulin secretion	2019-02-25	11/18493	9.57814e-05	0.00202546	0.000947731	GPI/IL6	2
BP	GO:0050805	negative regulation of synaptic transmission	2019-03-25	68/18493	0.000103208	0.00212583	0.000994695	PTGS2/IL1B/SLC6A4	3
BP	GO:1901607	alpha-amino acid biosynthetic process	2019-03-25	68/18493	0.000103208	0.00212583	0.000994695	CTH/MTR/GLUD1	3
BP	GO:0006069	ethanol oxidation	2019-02-25	12/18493	0.000114842	0.00233299	0.00109163	ADH1B/ALDH2	2
BP	GO:0050678	regulation of epithelial cell proliferation	2019-05-25	368/18493	0.000116208	0.00233299	0.00109163	PGR/MMP12/ARG1/VEGFA/AR	5
BP	GO:0006809	nitric oxide biosynthetic process	2019-03-25	73/18493	0.000127516	0.0024968	0.00116828	PTGS2/MMP8/IL1B	3
BP	GO:0042310	vasoconstriction	2019-03-25	73/18493	0.000127516	0.0024968	0.00116828	CHRM3/PTGS2/SLC6A4	3
BP	GO:0009086	methionine biosynthetic process	2019-02-25	13/18493	0.00013561	0.00256045	0.00119806	CTH/MTR	2
BP	GO:0031650	regulation of heat generation	2019-02-25	13/18493	0.00013561	0.00256045	0.00119806	PTGS2/IL1B	2
BP	GO:0035745	T-helper 2 cell cytokine production	2019-02-25	13/18493	0.00013561	0.00256045	0.00119806	ARG1/IL6	2
BP	GO:0071222	cellular response to lipopolysaccharide	2019-04-25	199/18493	0.000137851	0.00257213	0.00120353	ARG1/IL6/IL1B/LTF	4
BP	GO:0050679	positive regulation of epithelial cell proliferation	2019-04-25	203/18493	0.00014882	0.00269332	0.00126023	MMP12/ARG1/VEGFA/AR	4
BP	GO:0002718	regulation of cytokine production involved in immune response	2019-03-25	77/18493	0.00014944	0.00269332	0.00126023	ARG1/IL6/IL1B	3
BP	GO:0046209	nitric oxide metabolic process	2019-03-25	77/18493	0.00014944	0.00269332	0.00126023	PTGS2/MMP8/IL1B	3
BP	GO:0071219	cellular response to molecule of bacterial origin	2019-04-25	206/18493	0.000157452	0.00278574	0.00130347	ARG1/IL6/IL1B/LTF	4
BP	GO:0019372	lipoxygenase pathway	2019-02-25	14/18493	0.000158081	0.00278574	0.00130347	PTGS2/ALOX5	2
BP	GO:0002699	positive regulation of immune effector process	2019-04-25	209/18493	0.000166442	0.00288581	0.0013503	ARG1/GPI/IL6/IL1B	4
BP	GO:2001057	reactive nitrogen species metabolic process	2019-03-25	80/18493	0.000167399	0.00288581	0.0013503	PTGS2/MMP8/IL1B	3
BP	GO:0032755	positive regulation of interleukin-6 production	2019-03-25	81/18493	0.000173682	0.00293042	0.00137117	MMP8/IL6/IL1B	3
BP	GO:0097756	negative regulation of blood vessel diameter	2019-03-25	81/18493	0.000173682	0.00293042	0.00137117	CHRM3/PTGS2/SLC6A4	3
BP	GO:0043154	negative regulation of cysteine-type endopeptidase activity involved in apoptotic process	2019-03-25	84/18493	0.000193447	0.00319591	0.0014954	PTGS2/GPI/VEGFA	3
BP	GO:0051781	positive regulation of cell division	2019-03-25	84/18493	0.000193447	0.00319591	0.0014954	CAT/VEGFA/IL1B	3
BP	GO:0001894	tissue homeostasis	2019-04-25	221/18493	0.000206152	0.00335317	0.00156898	LYZ/VEGFA/IL6/LTF	4
BP	GO:0032225	regulation of synaptic transmission, dopaminergic	2019-02-25	16/18493	0.000208113	0.00335317	0.00156898	PTGS2/SLC6A4	2
BP	GO:2001234	negative regulation of apoptotic signaling pathway	2019-04-25	222/18493	0.000209744	0.00335317	0.00156898	PTGS2/CTH/IL1B/AR	4
BP	GO:0050829	defense response to Gram-negative bacterium	2019-03-25	87/18493	0.000214618	0.00335317	0.00156898	LYZ/IL6/LTF	3
BP	GO:0050673	epithelial cell proliferation	2019-05-25	420/18493	0.000215375	0.00335317	0.00156898	PGR/MMP12/ARG1/VEGFA/AR	5
BP	GO:0000302	response to reactive oxygen species	2019-04-25	224/18493	0.000217062	0.00335317	0.00156898	ARG1/CAT/IL6/MTR	4
BP	GO:1901342	regulation of vasculature development	2019-05-25	421/18493	0.000217766	0.00335317	0.00156898	PTGS2/CTH/VEGFA/IL6/IL1B	5
BP	GO:0001819	positive regulation of cytokine production	2019-05-25	422/18493	0.000220177	0.0033577	0.0015711	PTGS2/MMP8/MMP12/IL6/IL1B	5
BP	GO:0033273	response to vitamin	2019-03-25	89/18493	0.000229534	0.0034363	0.00160788	PTGS2/ARG1/CAT	3
BP	GO:1904018	positive regulation of vasculature development	2019-04-25	228/18493	0.00023225	0.0034363	0.00160788	PTGS2/CTH/VEGFA/IL1B	4
BP	GO:0006555	methionine metabolic process	2019-02-25	17/18493	0.000235666	0.0034363	0.00160788	CTH/MTR	2
BP	GO:0031649	heat generation	2019-02-25	17/18493	0.000235666	0.0034363	0.00160788	PTGS2/IL1B	2
BP	GO:0071216	cellular response to biotic stimulus	2019-04-25	229/18493	0.000236164	0.0034363	0.00160788	ARG1/IL6/IL1B/LTF	4
BP	GO:0002702	positive regulation of production of molecular mediator of immune response	2019-03-25	91/18493	0.000245107	0.00350216	0.00163869	GPI/IL6/IL1B	3
BP	GO:1901570	fatty acid derivative biosynthetic process	2019-03-25	91/18493	0.000245107	0.00350216	0.00163869	PTGS2/PTGS1/ALOX5	3
BP	GO:2000116	regulation of cysteine-type endopeptidase activity	2019-04-25	232/18493	0.000248192	0.00351457	0.0016445	PTGS2/GPI/VEGFA/LTF	4
BP	GO:0002697	regulation of immune effector process	2019-05-25	439/18493	0.000264375	0.00353058	0.00165199	MMP12/ARG1/GPI/IL6/IL1B	5
BP	GO:0002726	positive regulation of T cell cytokine production	2019-02-25	18/18493	0.000264905	0.00353058	0.00165199	IL6/IL1B	2
BP	GO:0033189	response to vitamin A	2019-02-25	18/18493	0.000264905	0.00353058	0.00165199	ARG1/CAT	2
BP	GO:0051023	regulation of immunoglobulin secretion	2019-02-25	18/18493	0.000264905	0.00353058	0.00165199	GPI/IL6	2
BP	GO:0060252	positive regulation of glial cell proliferation	2019-02-25	18/18493	0.000264905	0.00353058	0.00165199	IL6/IL1B	2
BP	GO:0060749	mammary gland alveolus development	2019-02-25	18/18493	0.000264905	0.00353058	0.00165199	VEGFA/AR	2
BP	GO:0061377	mammary gland lobule development	2019-02-25	18/18493	0.000264905	0.00353058	0.00165199	VEGFA/AR	2
BP	GO:1903426	regulation of reactive oxygen species biosynthetic process	2019-03-25	94/18493	0.000269723	0.00356484	0.00166803	PTGS2/MMP8/IL1B	3
BP	GO:0002367	cytokine production involved in immune response	2019-03-25	95/18493	0.000278271	0.00364741	0.00170666	ARG1/IL6/IL1B	3
BP	GO:0030949	positive regulation of vascular endothelial growth factor receptor signaling pathway	2019-02-25	19/18493	0.000295825	0.00384572	0.00179945	VEGFA/IL1B	2
BP	GO:2000379	positive regulation of reactive oxygen species metabolic process	2019-03-25	98/18493	0.000304958	0.00393223	0.00183993	PTGS2/MMP8/IL1B	3
BP	GO:1901606	alpha-amino acid catabolic process	2019-03-25	100/18493	0.000323637	0.00413943	0.00193688	ARG1/GPT/GLUD1	3
BP	GO:0010042	response to manganese ion	2019-02-25	20/18493	0.000328422	0.00415172	0.00194263	PTGS2/ARG1	2
BP	GO:0010951	negative regulation of endopeptidase activity	2019-04-25	250/18493	0.000329834	0.00415172	0.00194263	PTGS2/GPI/VEGFA/LTF	4
BP	GO:0098869	cellular oxidant detoxification	2019-03-25	101/18493	0.000333247	0.00416166	0.00194728	PTGS2/PTGS1/CAT	3
BP	GO:0002456	T cell mediated immunity	2019-03-25	102/18493	0.00034304	0.00425048	0.00198884	ARG1/IL6/IL1B	3
BP	GO:0033138	positive regulation of peptidyl-serine phosphorylation	2019-03-25	103/18493	0.000353016	0.00429276	0.00200862	PTGS2/VEGFA/IL6	3
BP	GO:0001818	negative regulation of cytokine production	2019-04-25	256/18493	0.000360886	0.00429276	0.00200862	MMP8/ARG1/IL6/LTF	4
BP	GO:0000097	sulfur amino acid biosynthetic process	2019-02-25	21/18493	0.000362692	0.00429276	0.00200862	CTH/MTR	2
BP	GO:0006067	ethanol metabolic process	2019-02-25	21/18493	0.000362692	0.00429276	0.00200862	ADH1B/ALDH2	2
BP	GO:0030728	ovulation	2019-02-25	21/18493	0.000362692	0.00429276	0.00200862	PTGS2/PGR	2
BP	GO:0048305	immunoglobulin secretion	2019-02-25	21/18493	0.000362692	0.00429276	0.00200862	GPI/IL6	2
BP	GO:1990748	cellular detoxification	2019-03-25	105/18493	0.000373527	0.00438825	0.00205331	PTGS2/PTGS1/CAT	3
BP	GO:0010466	negative regulation of peptidase activity	2019-04-25	261/18493	0.000388322	0.00452852	0.00211894	PTGS2/GPI/VEGFA/LTF	4
BP	GO:0031667	response to nutrient levels	2019-05-25	481/18493	0.000402625	0.00462667	0.00216486	PTGS2/ARG1/CAT/IL1B/SLC6A4	5
BP	GO:0001676	long-chain fatty acid metabolic process	2019-03-25	108/18493	0.000405709	0.00462667	0.00216486	PTGS2/PTGS1/ALOX5	3
BP	GO:0006690	icosanoid metabolic process	2019-03-25	108/18493	0.000405709	0.00462667	0.00216486	PTGS2/PTGS1/ALOX5	3
BP	GO:0016054	organic acid catabolic process	2019-04-25	265/18493	0.000411324	0.00462667	0.00216486	ARG1/GPT/CTH/GLUD1	4
BP	GO:0046395	carboxylic acid catabolic process	2019-04-25	265/18493	0.000411324	0.00462667	0.00216486	ARG1/GPT/CTH/GLUD1	4
BP	GO:0002440	production of molecular mediator of immune response	2019-04-25	268/18493	0.000429205	0.0047938	0.00224307	ARG1/GPI/IL6/IL1B	4
BP	GO:0009067	aspartate family amino acid biosynthetic process	2019-02-25	23/18493	0.000436234	0.00483823	0.00226386	CTH/MTR	2
BP	GO:0008015	blood circulation	2019-05-25	492/18493	0.000446535	0.00491809	0.00230122	CHRM3/PTGS2/PTGS1/SLC6A4/AR	5
BP	GO:0050878	regulation of body fluid levels	2019-05-25	493/18493	0.0004507	0.00492973	0.00230667	CHRM3/F13A1/GPI/VEGFA/IL6	5
BP	GO:0001516	prostaglandin biosynthetic process	2019-02-25	24/18493	0.000475497	0.00508244	0.00237812	PTGS2/PTGS1	2
BP	GO:0010288	response to lead ion	2019-02-25	24/18493	0.000475497	0.00508244	0.00237812	PTGS2/CAT	2
BP	GO:0046457	prostanoid biosynthetic process	2019-02-25	24/18493	0.000475497	0.00508244	0.00237812	PTGS2/PTGS1	2
BP	GO:0072593	reactive oxygen species metabolic process	2019-04-25	276/18493	0.000479604	0.00508244	0.00237812	PTGS2/MMP8/CAT/IL1B	4
BP	GO:0003013	circulatory system process	2019-05-25	500/18493	0.000480684	0.00508244	0.00237812	CHRM3/PTGS2/PTGS1/SLC6A4/AR	5
BP	GO:1903409	reactive oxygen species biosynthetic process	2019-03-25	115/18493	0.000487611	0.00512153	0.00239641	PTGS2/MMP8/IL1B	3
BP	GO:0060444	branching involved in mammary gland duct morphogenesis	2019-02-25	25/18493	0.000516417	0.0053884	0.00252129	PGR/AR	2
BP	GO:0022612	gland morphogenesis	2019-03-25	120/18493	0.000552163	0.00572373	0.00267819	PGR/ARG1/AR	3
BP	GO:0034599	cellular response to oxidative stress	2019-04-25	289/18493	0.00057033	0.00587366	0.00274834	ARG1/CAT/IL6/MTR	4
BP	GO:0010595	positive regulation of endothelial cell migration	2019-03-25	122/18493	0.000579442	0.005929	0.00277424	PTGS2/GPI/VEGFA	3
BP	GO:0032675	regulation of interleukin-6 production	2019-03-25	123/18493	0.000593399	0.00599446	0.00280487	MMP8/IL6/IL1B	3
BP	GO:0098754	detoxification	2019-03-25	123/18493	0.000593399	0.00599446	0.00280487	PTGS2/PTGS1/CAT	3
BP	GO:0072330	monocarboxylic acid biosynthetic process	2019-04-25	293/18493	0.000600548	0.0060169	0.00281537	PTGS2/PTGS1/GPI/ALOX5	4
BP	GO:0010575	positive regulation of vascular endothelial growth factor production	2019-02-25	27/18493	0.000603208	0.0060169	0.00281537	PTGS2/IL1B	2
BP	GO:0009065	glutamine family amino acid catabolic process	2019-02-25	28/18493	0.000649071	0.00643391	0.00301049	ARG1/GLUD1	2
BP	GO:0035296	regulation of tube diameter	2019-03-25	129/18493	0.000681677	0.0066737	0.00312269	CHRM3/PTGS2/SLC6A4	3
BP	GO:0097746	regulation of blood vessel diameter	2019-03-25	129/18493	0.000681677	0.0066737	0.00312269	CHRM3/PTGS2/SLC6A4	3
BP	GO:0042759	long-chain fatty acid biosynthetic process	2019-02-25	29/18493	0.000696573	0.00674203	0.00315466	PTGS2/ALOX5	2
BP	GO:0002831	regulation of response to biotic stimulus	2019-03-25	130/18493	0.000697158	0.00674203	0.00315466	MMP12/ARG1/LTF	3
BP	GO:0002705	positive regulation of leukocyte mediated immunity	2019-03-25	131/18493	0.000712862	0.00685212	0.00320618	ARG1/IL6/IL1B	3
BP	GO:0032635	interleukin-6 production	2019-03-25	132/18493	0.000728791	0.00696303	0.00325807	MMP8/IL6/IL1B	3
BP	GO:0002828	regulation of type 2 immune response	2019-02-25	30/18493	0.00074571	0.00708201	0.00331375	ARG1/IL6	2
BP	GO:0033135	regulation of peptidyl-serine phosphorylation	2019-03-25	135/18493	0.000777937	0.00734409	0.00343637	PTGS2/VEGFA/IL6	3
BP	GO:0050880	regulation of blood vessel size	2019-03-25	136/18493	0.000794776	0.00738722	0.00345656	CHRM3/PTGS2/SLC6A4	3
BP	GO:0001963	synaptic transmission, dopaminergic	2019-02-25	31/18493	0.000796479	0.00738722	0.00345656	PTGS2/SLC6A4	2
BP	GO:1900745	positive regulation of p38MAPK cascade	2019-02-25	31/18493	0.000796479	0.00738722	0.00345656	VEGFA/IL1B	2
BP	GO:0035150	regulation of tube size	2019-03-25	137/18493	0.000811846	0.0074427	0.00348252	CHRM3/PTGS2/SLC6A4	3
BP	GO:0046683	response to organophosphorus	2019-03-25	137/18493	0.000811846	0.0074427	0.00348252	PTGS2/IL1B/SLC6A4	3
BP	GO:0045987	positive regulation of smooth muscle contraction	2019-02-25	32/18493	0.000848874	0.00773744	0.00362042	CHRM3/PTGS2	2
BP	GO:0042542	response to hydrogen peroxide	2019-03-25	141/18493	0.00088246	0.00791153	0.00370188	ARG1/CAT/IL6	3
BP	GO:0010721	negative regulation of cell development	2019-04-25	326/18493	0.000894964	0.00791153	0.00370188	IL6/IL1B/SLC6A4/LTF	4
BP	GO:0030947	regulation of vascular endothelial growth factor receptor signaling pathway	2019-02-25	33/18493	0.000902892	0.00791153	0.00370188	VEGFA/IL1B	2
BP	GO:0033198	response to ATP	2019-02-25	33/18493	0.000902892	0.00791153	0.00370188	PTGS2/IL1B	2
BP	GO:0060251	regulation of glial cell proliferation	2019-02-25	33/18493	0.000902892	0.00791153	0.00370188	IL6/IL1B	2
BP	GO:0060603	mammary gland duct morphogenesis	2019-02-25	33/18493	0.000902892	0.00791153	0.00370188	PGR/AR	2
BP	GO:1905332	positive regulation of morphogenesis of an epithelium	2019-02-25	33/18493	0.000902892	0.00791153	0.00370188	VEGFA/AR	2
BP	GO:0051260	protein homooligomerization	2019-04-25	328/18493	0.000915564	0.00797848	0.00373321	ARG1/CAT/CTH/SLC6A4	4
BP	GO:0002822	regulation of adaptive immune response based on somatic recombination of immune receptors built from immunoglobulin superfamily domains	2019-03-25	144/18493	0.000937907	0.00812853	0.00380342	ARG1/IL6/IL1B	3
BP	GO:0002262	myeloid cell homeostasis	2019-03-25	146/18493	0.000976074	0.00836786	0.0039154	GPI/VEGFA/IL6	3
BP	GO:0002706	regulation of lymphocyte mediated immunity	2019-03-25	146/18493	0.000976074	0.00836786	0.0039154	ARG1/IL6/IL1B	3
BP	GO:0002673	regulation of acute inflammatory response	2019-03-25	149/18493	0.00103515	0.00877943	0.00410798	PTGS2/IL6/IL1B	3
BP	GO:0051384	response to glucocorticoid	2019-03-25	149/18493	0.00103515	0.00877943	0.00410798	PTGS2/ARG1/IL6	3
BP	GO:0048754	branching morphogenesis of an epithelial tube	2019-03-25	150/18493	0.00105534	0.00888632	0.004158	PGR/VEGFA/AR	3
BP	GO:0006692	prostanoid metabolic process	2019-02-25	36/18493	0.00107464	0.00888632	0.004158	PTGS2/PTGS1	2
BP	GO:0006693	prostaglandin metabolic process	2019-02-25	36/18493	0.00107464	0.00888632	0.004158	PTGS2/PTGS1	2
BP	GO:0042092	type 2 immune response	2019-02-25	36/18493	0.00107464	0.00888632	0.004158	ARG1/IL6	2
BP	GO:0014074	response to purine-containing compound	2019-03-25	151/18493	0.00107577	0.00888632	0.004158	PTGS2/IL1B/SLC6A4	3
BP	GO:0016999	antibiotic metabolic process	2019-03-25	152/18493	0.00109646	0.00901025	0.00421598	ADH1B/CAT/ALDH2	3
BP	GO:0001505	regulation of neurotransmitter levels	2019-04-25	346/18493	0.00111634	0.0090881	0.00425241	PTGS2/MMP8/IL1B/SLC6A4	4
BP	GO:0042129	regulation of T cell proliferation	2019-03-25	153/18493	0.00111739	0.0090881	0.00425241	ARG1/IL6/IL1B	3
BP	GO:0002251	organ or tissue specific immune response	2019-02-25	37/18493	0.00113511	0.00918116	0.00429596	IL6/LTF	2
BP	GO:0006066	alcohol metabolic process	2019-04-25	348/18493	0.00114041	0.00918116	0.00429596	ADH1B/CAT/IL1B/ALDH2	4
BP	GO:0006959	humoral immune response	2019-04-25	349/18493	0.00115258	0.00923229	0.00431988	LYZ/GPI/IL6/LTF	4
BP	GO:0001959	regulation of cytokine-mediated signaling pathway	2019-03-25	155/18493	0.00116001	0.00924513	0.00432589	MMP12/ARG1/IL6	3
BP	GO:0006633	fatty acid biosynthetic process	2019-03-25	156/18493	0.00118171	0.00937093	0.00438475	PTGS2/PTGS1/ALOX5	3
BP	GO:0090050	positive regulation of cell migration involved in sprouting angiogenesis	2019-02-25	38/18493	0.00119718	0.00944641	0.00442007	PTGS2/VEGFA	2
BP	GO:0002819	regulation of adaptive immune response	2019-03-25	157/18493	0.00120365	0.00945047	0.00442197	ARG1/IL6/IL1B	3
BP	GO:0001906	cell killing	2019-03-25	158/18493	0.00122586	0.0095774	0.00448136	LYZ/ARG1/LTF	3
BP	GO:0050832	defense response to fungus	2019-02-25	39/18493	0.00126085	0.00978579	0.00457887	ARG1/LTF	2
BP	GO:0010038	response to metal ion	2019-04-25	358/18493	0.00126628	0.00978579	0.00457887	PTGS2/ARG1/CAT/GPI	4
BP	GO:1901568	fatty acid derivative metabolic process	2019-03-25	160/18493	0.00127104	0.00978579	0.00457887	PTGS2/PTGS1/ALOX5	3
BP	GO:0045861	negative regulation of proteolysis	2019-04-25	359/18493	0.00127939	0.00980245	0.00458667	PTGS2/GPI/VEGFA/LTF	4
BP	GO:0003018	vascular process in circulatory system	2019-03-25	161/18493	0.00129402	0.00981972	0.00459474	CHRM3/PTGS2/SLC6A4	3
BP	GO:0035821	modification of morphology or physiology of other organism	2019-03-25	161/18493	0.00129402	0.00981972	0.00459474	LYZ/ARG1/LTF	3
BP	GO:0034614	cellular response to reactive oxygen species	2019-03-25	162/18493	0.00131727	0.00990134	0.00463294	ARG1/IL6/MTR	3
BP	GO:0051302	regulation of cell division	2019-03-25	162/18493	0.00131727	0.00990134	0.00463294	CAT/VEGFA/IL1B	3
BP	GO:0010634	positive regulation of epithelial cell migration	2019-03-25	165/18493	0.00138857	0.010228	0.00478577	PTGS2/GPI/VEGFA	3
BP	GO:0060759	regulation of response to cytokine stimulus	2019-03-25	165/18493	0.00138857	0.010228	0.00478577	MMP12/ARG1/IL6	3
BP	GO:0030574	collagen catabolic process	2019-02-25	41/18493	0.00139296	0.010228	0.00478577	MMP8/MMP12	2
BP	GO:0033574	response to testosterone	2019-02-25	41/18493	0.00139296	0.010228	0.00478577	GPI/AR	2
BP	GO:0035886	vascular smooth muscle cell differentiation	2019-02-25	41/18493	0.00139296	0.010228	0.00478577	CTH/VEGFA	2
BP	GO:0031960	response to corticosteroid	2019-03-25	166/18493	0.00141287	0.0103263	0.00483179	PTGS2/ARG1/IL6	3
BP	GO:0030324	lung development	2019-03-25	169/18493	0.00148737	0.010821	0.00506323	PGR/ARG1/VEGFA	3
BP	GO:0014009	glial cell proliferation	2019-02-25	43/18493	0.00153142	0.0110402	0.00516581	IL6/IL1B	2
BP	GO:0001659	temperature homeostasis	2019-03-25	171/18493	0.00153838	0.0110402	0.00516581	PTGS2/VEGFA/IL1B	3
BP	GO:0032874	positive regulation of stress-activated MAPK cascade	2019-03-25	171/18493	0.00153838	0.0110402	0.00516581	MMP8/VEGFA/IL1B	3
BP	GO:0070304	positive regulation of stress-activated protein kinase signaling cascade	2019-03-25	172/18493	0.0015643	0.0111756	0.00522917	MMP8/VEGFA/IL1B	3
BP	GO:0001503	ossification	2019-04-25	380/18493	0.00157709	0.0112	0.00524057	PTGS2/CAT/IL6/LTF	4
BP	GO:0030323	respiratory tube development	2019-03-25	173/18493	0.00159049	0.0112	0.00524057	PGR/ARG1/VEGFA	3
BP	GO:0045765	regulation of angiogenesis	2019-04-25	381/18493	0.00159237	0.0112	0.00524057	PTGS2/VEGFA/IL6/IL1B	4
BP	GO:0000096	sulfur amino acid metabolic process	2019-02-25	44/18493	0.00160302	0.0112	0.00524057	CTH/MTR	2
BP	GO:0002639	positive regulation of immunoglobulin production	2019-02-25	44/18493	0.00160302	0.0112	0.00524057	GPI/IL6	2
BP	GO:0008217	regulation of blood pressure	2019-03-25	177/18493	0.001698	0.0118115	0.00552673	PTGS2/PTGS1/AR	3
BP	GO:0042098	T cell proliferation	2019-03-25	178/18493	0.00172557	0.0119185	0.00557677	ARG1/IL6/IL1B	3
BP	GO:0002711	positive regulation of T cell mediated immunity	2019-02-25	46/18493	0.00175093	0.0119185	0.00557677	IL6/IL1B	2
BP	GO:0045824	negative regulation of innate immune response	2019-02-25	46/18493	0.00175093	0.0119185	0.00557677	MMP12/ARG1	2
BP	GO:1900744	regulation of p38MAPK cascade	2019-02-25	46/18493	0.00175093	0.0119185	0.00557677	VEGFA/IL1B	2
BP	GO:2001233	regulation of apoptotic signaling pathway	2019-04-25	391/18493	0.00175095	0.0119185	0.00557677	PTGS2/CTH/IL1B/AR	4
BP	GO:0043123	positive regulation of I-kappaB kinase/NF-kappaB signaling	2019-03-25	181/18493	0.00180997	0.0122676	0.00574013	CTH/IL1B/LTF	3
BP	GO:0002720	positive regulation of cytokine production involved in immune response	2019-02-25	47/18493	0.00182724	0.0122797	0.00574578	IL6/IL1B	2
BP	GO:0006636	unsaturated fatty acid biosynthetic process	2019-02-25	47/18493	0.00182724	0.0122797	0.00574578	PTGS2/PTGS1	2
BP	GO:0061138	morphogenesis of a branching epithelium	2019-03-25	182/18493	0.00183867	0.0123044	0.00575733	PGR/VEGFA/AR	3
BP	GO:0045933	positive regulation of muscle contraction	2019-02-25	48/18493	0.00190511	0.0126954	0.0059403	CHRM3/PTGS2	2
BP	GO:2000377	regulation of reactive oxygen species metabolic process	2019-03-25	185/18493	0.00192647	0.012784	0.00598178	PTGS2/MMP8/IL1B	3
BP	GO:1901654	response to ketone	2019-03-25	190/18493	0.00207856	0.0137358	0.00642714	ARG1/GPI/AR	3
BP	GO:0009066	aspartate family amino acid metabolic process	2019-02-25	51/18493	0.00214805	0.0140198	0.00655998	CTH/MTR	2
BP	GO:0009620	response to fungus	2019-02-25	51/18493	0.00214805	0.0140198	0.00655998	ARG1/LTF	2
BP	GO:0019369	arachidonic acid metabolic process	2019-02-25	51/18493	0.00214805	0.0140198	0.00655998	PTGS2/PTGS1	2
BP	GO:0060541	respiratory system development	2019-03-25	194/18493	0.00220549	0.0142174	0.00665248	PGR/ARG1/VEGFA	3
BP	GO:0043434	response to peptide hormone	2019-04-25	417/18493	0.00221434	0.0142174	0.00665248	PTGS2/ARG1/CAT/IL1B	4
BP	GO:0052548	regulation of endopeptidase activity	2019-04-25	417/18493	0.00221434	0.0142174	0.00665248	PTGS2/GPI/VEGFA/LTF	4
BP	GO:0007566	embryo implantation	2019-02-25	52/18493	0.00223212	0.0142174	0.00665248	PTGS2/IL1B	2
BP	GO:0032964	collagen biosynthetic process	2019-02-25	52/18493	0.00223212	0.0142174	0.00665248	ARG1/IL6	2
BP	GO:0038066	p38MAPK cascade	2019-02-25	52/18493	0.00223212	0.0142174	0.00665248	VEGFA/IL1B	2
BP	GO:0001763	morphogenesis of a branching structure	2019-03-25	196/18493	0.00227072	0.0143481	0.00671361	PGR/VEGFA/AR	3
BP	GO:0002703	regulation of leukocyte mediated immunity	2019-03-25	196/18493	0.00227072	0.0143481	0.00671361	ARG1/IL6/IL1B	3
BP	GO:0009435	NAD biosynthetic process	2019-02-25	53/18493	0.00231774	0.0145294	0.00679844	PTGS2/GPI	2
BP	GO:0032722	positive regulation of chemokine production	2019-02-25	53/18493	0.00231774	0.0145294	0.00679844	IL6/IL1B	2
BP	GO:0097529	myeloid leukocyte migration	2019-03-25	199/18493	0.00237081	0.0146985	0.00687757	VEGFA/IL6/IL1B	3
BP	GO:0050727	regulation of inflammatory response	2019-04-25	425/18493	0.00237252	0.0146985	0.00687757	PTGS2/MMP8/IL6/IL1B	4
BP	GO:0060249	anatomical structure homeostasis	2019-04-25	425/18493	0.00237252	0.0146985	0.00687757	LYZ/VEGFA/IL6/LTF	4
BP	GO:0045766	positive regulation of angiogenesis	2019-03-25	200/18493	0.00240478	0.0148404	0.00694396	PTGS2/VEGFA/IL1B	3
BP	GO:0048608	reproductive structure development	2019-04-25	428/18493	0.0024338	0.0149613	0.00700053	PTGS2/PGR/VEGFA/AR	4
BP	GO:0002064	epithelial cell development	2019-03-25	202/18493	0.00247361	0.0151473	0.00708756	PGR/IL1B/AR	3
BP	GO:0070498	interleukin-1-mediated signaling pathway	2019-02-25	55/18493	0.00249358	0.0151683	0.00709742	IL6/IL1B	2
BP	GO:0061458	reproductive system development	2019-04-25	431/18493	0.00249618	0.0151683	0.00709742	PTGS2/PGR/VEGFA/AR	4
BP	GO:0009612	response to mechanical stimulus	2019-03-25	204/18493	0.00254366	0.0152907	0.00715466	PTGS2/GPI/IL1B	3
BP	GO:0048732	gland development	2019-04-25	434/18493	0.00255965	0.0152907	0.00715466	PGR/ARG1/VEGFA/AR	4
BP	GO:0050670	regulation of lymphocyte proliferation	2019-03-25	205/18493	0.00257914	0.0152907	0.00715466	ARG1/IL6/IL1B	3
BP	GO:0019229	regulation of vasoconstriction	2019-02-25	56/18493	0.0025838	0.0152907	0.00715466	CHRM3/PTGS2	2
BP	GO:0031663	lipopolysaccharide-mediated signaling pathway	2019-02-25	56/18493	0.0025838	0.0152907	0.00715466	IL1B/LTF	2
BP	GO:0032890	regulation of organic acid transport	2019-02-25	56/18493	0.0025838	0.0152907	0.00715466	ARG1/IL1B	2
BP	GO:0060688	regulation of morphogenesis of a branching structure	2019-02-25	56/18493	0.0025838	0.0152907	0.00715466	VEGFA/AR	2
BP	GO:0032944	regulation of mononuclear cell proliferation	2019-03-25	206/18493	0.00261493	0.0154174	0.00721395	ARG1/IL6/IL1B	3
BP	GO:0017001	antibiotic catabolic process	2019-02-25	57/18493	0.00267554	0.0157163	0.00735383	CAT/ALDH2	2
BP	GO:0043281	regulation of cysteine-type endopeptidase activity involved in apoptotic process	2019-03-25	209/18493	0.00272414	0.0159428	0.00745978	PTGS2/GPI/VEGFA	3
BP	GO:0052547	regulation of peptidase activity	2019-04-25	442/18493	0.00273436	0.0159437	0.00746023	PTGS2/GPI/VEGFA/LTF	4
BP	GO:0002526	acute inflammatory response	2019-03-25	211/18493	0.0027985	0.016258	0.00760726	PTGS2/IL6/IL1B	3
BP	GO:0001649	osteoblast differentiation	2019-03-25	214/18493	0.00291238	0.0168578	0.00788793	CAT/IL6/LTF	3
BP	GO:0008406	gonad development	2019-03-25	216/18493	0.00298987	0.0171809	0.00803912	PGR/VEGFA/AR	3
BP	GO:0070663	regulation of leukocyte proliferation	2019-03-25	216/18493	0.00298987	0.0171809	0.00803912	ARG1/IL6/IL1B	3
BP	GO:0030595	leukocyte chemotaxis	2019-03-25	217/18493	0.00302909	0.0173434	0.00811517	VEGFA/IL6/IL1B	3
BP	GO:0045669	positive regulation of osteoblast differentiation	2019-02-25	61/18493	0.00305769	0.0174442	0.00816234	IL6/LTF	2
BP	GO:0051346	negative regulation of hydrolase activity	2019-04-25	458/18493	0.00310818	0.0176687	0.00826738	PTGS2/GPI/VEGFA/LTF	4
BP	GO:0006940	regulation of smooth muscle contraction	2019-02-25	62/18493	0.00315701	0.0178822	0.00836725	CHRM3/PTGS2	2
BP	GO:0010594	regulation of endothelial cell migration	2019-03-25	222/18493	0.00322996	0.0181657	0.00849989	PTGS2/GPI/VEGFA	3
BP	GO:0045137	development of primary sexual characteristics	2019-03-25	222/18493	0.00322996	0.0181657	0.00849989	PGR/VEGFA/AR	3
BP	GO:0002637	regulation of immunoglobulin production	2019-02-25	63/18493	0.00325782	0.0182576	0.00854292	GPI/IL6	2
BP	GO:0043122	regulation of I-kappaB kinase/NF-kappaB signaling	2019-03-25	226/18493	0.00339644	0.0189674	0.00887505	CTH/IL1B/LTF	3
BP	GO:0006091	generation of precursor metabolites and energy	2019-04-25	471/18493	0.00343672	0.019125	0.00894879	ADH1B/CAT/GPI/ALDH2	4
BP	GO:0014015	positive regulation of gliogenesis	2019-02-25	66/18493	0.00356924	0.0197241	0.0092291	IL6/IL1B	2
BP	GO:0019915	lipid storage	2019-02-25	66/18493	0.00356924	0.0197241	0.0092291	IL6/IL1B	2
BP	GO:0002009	morphogenesis of an epithelium	2019-04-25	479/18493	0.00365031	0.0201021	0.00940596	PGR/MMP12/VEGFA/AR	4
BP	GO:0046824	positive regulation of nucleocytoplasmic transport	2019-02-25	67/18493	0.00367602	0.0201041	0.00940689	PTGS2/IL1B	2
BP	GO:1903672	positive regulation of sprouting angiogenesis	2019-02-25	67/18493	0.00367602	0.0201041	0.00940689	PTGS2/VEGFA	2
BP	GO:1901652	response to peptide	2019-04-25	481/18493	0.0037051	0.0201934	0.00944871	PTGS2/ARG1/CAT/IL1B	4
BP	GO:0032872	regulation of stress-activated MAPK cascade	2019-03-25	235/18493	0.00379009	0.0205859	0.00963235	MMP8/VEGFA/IL1B	3
BP	GO:0070302	regulation of stress-activated protein kinase signaling cascade	2019-03-25	237/18493	0.0038812	0.0210088	0.00983024	MMP8/VEGFA/IL1B	3
BP	GO:0048678	response to axon injury	2019-02-25	70/18493	0.00400526	0.0215334	0.0100757	ARG1/MTR	2
BP	GO:1901224	positive regulation of NIK/NF-kappaB signaling	2019-02-25	70/18493	0.00400526	0.0215334	0.0100757	MMP8/IL1B	2
BP	GO:0019674	NAD metabolic process	2019-02-25	71/18493	0.00411795	0.0219901	0.0102894	PTGS2/GPI	2
BP	GO:0061180	mammary gland epithelium development	2019-02-25	71/18493	0.00411795	0.0219901	0.0102894	PGR/AR	2
BP	GO:0090066	regulation of anatomical structure size	2019-04-25	497/18493	0.00416381	0.0221604	0.0103691	CHRM3/PTGS2/VEGFA/SLC6A4	4
BP	GO:0030072	peptide hormone secretion	2019-03-25	244/18493	0.00421063	0.0223347	0.0104506	IL6/IL1B/GLUD1	3
BP	GO:0001895	retina homeostasis	2019-02-25	73/18493	0.00434773	0.0229569	0.0107418	LYZ/LTF	2
BP	GO:0007611	learning or memory	2019-03-25	247/18493	0.00435689	0.0229569	0.0107418	PTGS2/GPI/SLC6A4	3
BP	GO:0048872	homeostasis of number of cells	2019-03-25	248/18493	0.00440632	0.0231405	0.0108277	GPI/VEGFA/IL6	3
BP	GO:0022617	extracellular matrix disassembly	2019-02-25	74/18493	0.00446481	0.0233703	0.0109352	MMP8/MMP12	2
BP	GO:0032642	regulation of chemokine production	2019-02-25	75/18493	0.00458335	0.0239118	0.0111886	IL6/IL1B	2
BP	GO:0034308	primary alcohol metabolic process	2019-02-25	76/18493	0.00470334	0.024298	0.0113693	ADH1B/ALDH2	2
BP	GO:0051145	smooth muscle cell differentiation	2019-02-25	76/18493	0.00470334	0.024298	0.0113693	CTH/VEGFA	2
BP	GO:0051851	modification by host of symbiont morphology or physiology	2019-02-25	76/18493	0.00470334	0.024298	0.0113693	ARG1/LTF	2
BP	GO:0007249	I-kappaB kinase/NF-kappaB signaling	2019-03-25	258/18493	0.00491956	0.0251506	0.0117682	CTH/IL1B/LTF	3
BP	GO:0009064	glutamine family amino acid metabolic process	2019-02-25	78/18493	0.00494766	0.0251506	0.0117682	ARG1/GLUD1	2
BP	GO:0046889	positive regulation of lipid biosynthetic process	2019-02-25	78/18493	0.00494766	0.0251506	0.0117682	PTGS2/IL1B	2
BP	GO:0051289	protein homotetramerization	2019-02-25	78/18493	0.00494766	0.0251506	0.0117682	CAT/CTH	2
BP	GO:0071260	cellular response to mechanical stimulus	2019-02-25	78/18493	0.00494766	0.0251506	0.0117682	PTGS2/IL1B	2
BP	GO:0071383	cellular response to steroid hormone stimulus	2019-03-25	259/18493	0.00497279	0.0251976	0.0117902	PGR/ARG1/AR	3
BP	GO:0043536	positive regulation of blood vessel endothelial cell migration	2019-02-25	79/18493	0.00507198	0.0256184	0.0119871	PTGS2/VEGFA	2
BP	GO:0051702	interaction with symbiont	2019-02-25	80/18493	0.00519774	0.0261702	0.0122453	ARG1/LTF	2
BP	GO:0046651	lymphocyte proliferation	2019-03-25	264/18493	0.0052442	0.0263206	0.0123157	ARG1/IL6/IL1B	3
BP	GO:0032943	mononuclear cell proliferation	2019-03-25	266/18493	0.00535523	0.0267088	0.0124973	ARG1/IL6/IL1B	3
BP	GO:0043542	endothelial cell migration	2019-03-25	266/18493	0.00535523	0.0267088	0.0124973	PTGS2/GPI/VEGFA	3
BP	GO:0032602	chemokine production	2019-02-25	82/18493	0.00545355	0.0270147	0.0126405	IL6/IL1B	2
BP	GO:0110110	positive regulation of animal organ morphogenesis	2019-02-25	82/18493	0.00545355	0.0270147	0.0126405	VEGFA/AR	2
BP	GO:0007548	sex differentiation	2019-03-25	268/18493	0.00546768	0.0270147	0.0126405	PGR/VEGFA/AR	3
BP	GO:0021700	developmental maturation	2019-03-25	271/18493	0.00563901	0.0277748	0.0129961	PGR/VEGFA/LTF	3
BP	GO:0002690	positive regulation of leukocyte chemotaxis	2019-02-25	84/18493	0.00571506	0.027804	0.0130098	VEGFA/IL6	2
BP	GO:0045778	positive regulation of ossification	2019-02-25	84/18493	0.00571506	0.027804	0.0130098	IL6/LTF	2
BP	GO:0070542	response to fatty acid	2019-02-25	84/18493	0.00571506	0.027804	0.0130098	PTGS2/CAT	2
BP	GO:2000177	regulation of neural precursor cell proliferation	2019-02-25	84/18493	0.00571506	0.027804	0.0130098	VEGFA/SLC6A4	2
BP	GO:0090049	regulation of cell migration involved in sprouting angiogenesis	2019-02-25	85/18493	0.00584795	0.0283634	0.0132715	PTGS2/VEGFA	2
BP	GO:0050768	negative regulation of neurogenesis	2019-03-25	279/18493	0.00611168	0.0294926	0.0137999	IL6/IL1B/SLC6A4	3
BP	GO:0031058	positive regulation of histone modification	2019-02-25	87/18493	0.00611796	0.0294926	0.0137999	VEGFA/IL1B	2
BP	GO:0009410	response to xenobiotic stimulus	2019-03-25	282/18493	0.0062949	0.0301623	0.0141132	PTGS1/ARG1/GPI	3
BP	GO:0018105	peptidyl-serine phosphorylation	2019-03-25	282/18493	0.0062949	0.0301623	0.0141132	PTGS2/VEGFA/IL6	3
BP	GO:0070661	leukocyte proliferation	2019-03-25	283/18493	0.00635669	0.0303666	0.0142088	ARG1/IL6/IL1B	3
BP	GO:0010632	regulation of epithelial cell migration	2019-03-25	284/18493	0.00641886	0.03048	0.0142619	PTGS2/GPI/VEGFA	3
BP	GO:0051403	stress-activated MAPK cascade	2019-03-25	284/18493	0.00641886	0.03048	0.0142619	MMP8/VEGFA/IL1B	3
BP	GO:0050890	cognition	2019-03-25	285/18493	0.00648139	0.030685	0.0143578	PTGS2/GPI/SLC6A4	3
BP	GO:0044070	regulation of anion transport	2019-02-25	91/18493	0.00667482	0.0314132	0.0146986	ARG1/IL1B	2
BP	GO:0048010	vascular endothelial growth factor receptor signaling pathway	2019-02-25	91/18493	0.00667482	0.0314132	0.0146986	VEGFA/IL1B	2
BP	GO:0007589	body fluid secretion	2019-02-25	93/18493	0.00696162	0.0325697	0.0152397	CHRM3/VEGFA	2
BP	GO:1901655	cellular response to ketone	2019-02-25	93/18493	0.00696162	0.0325697	0.0152397	ARG1/AR	2
BP	GO:1903037	regulation of leukocyte cell-cell adhesion	2019-03-25	293/18493	0.00699483	0.0326288	0.0152673	ARG1/IL6/IL1B	3
BP	GO:0042035	regulation of cytokine biosynthetic process	2019-02-25	94/18493	0.00710709	0.032763	0.0153301	IL6/IL1B	2
BP	GO:0050830	defense response to Gram-positive bacterium	2019-02-25	94/18493	0.00710709	0.032763	0.0153301	LYZ/IL6	2
BP	GO:0070301	cellular response to hydrogen peroxide	2019-02-25	94/18493	0.00710709	0.032763	0.0153301	ARG1/IL6	2
BP	GO:1905269	positive regulation of chromatin organization	2019-02-25	94/18493	0.00710709	0.032763	0.0153301	VEGFA/IL1B	2
BP	GO:0060326	cell chemotaxis	2019-03-25	295/18493	0.00712688	0.032763	0.0153301	VEGFA/IL6/IL1B	3
BP	GO:0051961	negative regulation of nervous system development	2019-03-25	298/18493	0.00732774	0.033589	0.0157166	IL6/IL1B/SLC6A4	3
BP	GO:0001657	ureteric bud development	2019-02-25	96/18493	0.00740218	0.0338324	0.0158305	CAT/VEGFA	2
BP	GO:0018209	peptidyl-serine modification	2019-03-25	301/18493	0.00753197	0.0341229	0.0159664	PTGS2/VEGFA/IL6	3
BP	GO:0042102	positive regulation of T cell proliferation	2019-02-25	97/18493	0.00755179	0.0341229	0.0159664	IL6/IL1B	2
BP	GO:0072163	mesonephric epithelium development	2019-02-25	97/18493	0.00755179	0.0341229	0.0159664	CAT/VEGFA	2
BP	GO:0072164	mesonephric tubule development	2019-02-25	97/18493	0.00755179	0.0341229	0.0159664	CAT/VEGFA	2
BP	GO:0008585	female gonad development	2019-02-25	98/18493	0.00770276	0.0346079	0.0161934	PGR/VEGFA	2
BP	GO:0048661	positive regulation of smooth muscle cell proliferation	2019-02-25	98/18493	0.00770276	0.0346079	0.0161934	PTGS2/IL6	2
BP	GO:0050863	regulation of T cell activation	2019-03-25	305/18493	0.00780951	0.0349884	0.0163714	ARG1/IL6/IL1B	3
BP	GO:0046879	hormone secretion	2019-03-25	306/18493	0.00787983	0.035204	0.0164723	IL6/IL1B/GLUD1	3
BP	GO:0002824	positive regulation of adaptive immune response based on somatic recombination of immune receptors built from immunoglobulin superfamily domains	2019-02-25	100/18493	0.00800881	0.0356797	0.0166949	IL6/IL1B	2
BP	GO:0001823	mesonephros development	2019-02-25	101/18493	0.00816387	0.0361673	0.016923	CAT/VEGFA	2
BP	GO:0002042	cell migration involved in sprouting angiogenesis	2019-02-25	101/18493	0.00816387	0.0361673	0.016923	PTGS2/VEGFA	2
BP	GO:0001701	in utero embryonic development	2019-03-25	311/18493	0.00823712	0.0362891	0.01698	GPI/VEGFA/AR	3
BP	GO:0007568	aging	2019-03-25	311/18493	0.00823712	0.0362891	0.01698	PTGS2/ARG1/CAT	3
BP	GO:0033559	unsaturated fatty acid metabolic process	2019-02-25	102/18493	0.00832029	0.036453	0.0170567	PTGS2/PTGS1	2
BP	GO:1901222	regulation of NIK/NF-kappaB signaling	2019-02-25	102/18493	0.00832029	0.036453	0.0170567	MMP8/IL1B	2
BP	GO:0031098	stress-activated protein kinase signaling cascade	2019-03-25	313/18493	0.00838269	0.0365246	0.0170902	MMP8/VEGFA/IL1B	3
BP	GO:0060562	epithelial tube morphogenesis	2019-03-25	313/18493	0.00838269	0.0365246	0.0170902	PGR/VEGFA/AR	3
BP	GO:0046545	development of primary female sexual characteristics	2019-02-25	103/18493	0.00847805	0.0368389	0.0172373	PGR/VEGFA	2
BP	GO:0009914	hormone transport	2019-03-25	316/18493	0.0086039	0.0372243	0.0174176	IL6/IL1B/GLUD1	3
BP	GO:0030282	bone mineralization	2019-02-25	104/18493	0.00863717	0.0372243	0.0174176	PTGS2/LTF	2
BP	GO:2001237	negative regulation of extrinsic apoptotic signaling pathway	2019-02-25	104/18493	0.00863717	0.0372243	0.0174176	IL1B/AR	2
BP	GO:0002708	positive regulation of lymphocyte mediated immunity	2019-02-25	105/18493	0.00879763	0.0375082	0.0175504	IL6/IL1B	2
BP	GO:0002821	positive regulation of adaptive immune response	2019-02-25	105/18493	0.00879763	0.0375082	0.0175504	IL6/IL1B	2
BP	GO:0006939	smooth muscle contraction	2019-02-25	105/18493	0.00879763	0.0375082	0.0175504	CHRM3/PTGS2	2
BP	GO:0042089	cytokine biosynthetic process	2019-02-25	105/18493	0.00879763	0.0375082	0.0175504	IL6/IL1B	2
BP	GO:0042742	defense response to bacterium	2019-03-25	319/18493	0.00882855	0.0375391	0.0175649	LYZ/IL6/LTF	3
BP	GO:0019359	nicotinamide nucleotide biosynthetic process	2019-02-25	106/18493	0.00895943	0.0377916	0.0176831	PTGS2/GPI	2
BP	GO:0019363	pyridine nucleotide biosynthetic process	2019-02-25	106/18493	0.00895943	0.0377916	0.0176831	PTGS2/GPI	2
BP	GO:0042107	cytokine metabolic process	2019-02-25	106/18493	0.00895943	0.0377916	0.0176831	IL6/IL1B	2
BP	GO:0001655	urogenital system development	2019-03-25	322/18493	0.00905664	0.0381004	0.0178275	CAT/VEGFA/AR	3
BP	GO:0046677	response to antibiotic	2019-03-25	323/18493	0.00913344	0.0382207	0.0178838	ARG1/CAT/IL6	3
BP	GO:0071902	positive regulation of protein serine/threonine kinase activity	2019-03-25	323/18493	0.00913344	0.0382207	0.0178838	VEGFA/IL1B/LTF	3
BP	GO:0007159	leukocyte cell-cell adhesion	2019-03-25	327/18493	0.00944449	0.0392466	0.0183639	ARG1/IL6/IL1B	3
BP	GO:0002688	regulation of leukocyte chemotaxis	2019-02-25	109/18493	0.00945283	0.0392466	0.0183639	VEGFA/IL6	2
BP	GO:0072525	pyridine-containing compound biosynthetic process	2019-02-25	109/18493	0.00945283	0.0392466	0.0183639	PTGS2/GPI	2
BP	GO:0001938	positive regulation of endothelial cell proliferation	2019-02-25	112/18493	0.00995817	0.0408105	0.0190956	ARG1/VEGFA	2
BP	GO:0007613	memory	2019-02-25	112/18493	0.00995817	0.0408105	0.0190956	PTGS2/SLC6A4	2
BP	GO:0014013	regulation of gliogenesis	2019-02-25	112/18493	0.00995817	0.0408105	0.0190956	IL6/IL1B	2
BP	GO:0046822	regulation of nucleocytoplasmic transport	2019-02-25	112/18493	0.00995817	0.0408105	0.0190956	PTGS2/IL1B	2
BP	GO:0051817	modification of morphology or physiology of other organism involved in symbiotic interaction	2019-02-25	112/18493	0.00995817	0.0408105	0.0190956	ARG1/LTF	2
BP	GO:0048638	regulation of developmental growth	2019-03-25	334/18493	0.0100037	0.0408916	0.0191336	VEGFA/SLC6A4/AR	3
BP	GO:0006090	pyruvate metabolic process	2019-02-25	113/18493	0.0101292	0.0412982	0.0193238	GPI/LDHB	2
BP	GO:0007599	hemostasis	2019-03-25	339/18493	0.0104149	0.0423538	0.0198178	F13A1/GPI/IL6	3
BP	GO:0001952	regulation of cell-matrix adhesion	2019-02-25	117/18493	0.0108266	0.0438407	0.0205135	MMP12/VEGFA	2
BP	GO:0002449	lymphocyte mediated immunity	2019-03-25	344/18493	0.0108358	0.0438407	0.0205135	ARG1/IL6/IL1B	3
BP	GO:0001704	formation of primary germ layer	2019-02-25	118/18493	0.0110042	0.0440832	0.020627	MMP8/GPI	2
BP	GO:0019730	antimicrobial humoral response	2019-02-25	118/18493	0.0110042	0.0440832	0.020627	LYZ/LTF	2
BP	GO:0046660	female sex differentiation	2019-02-25	118/18493	0.0110042	0.0440832	0.020627	PGR/VEGFA	2
BP	GO:0010631	epithelial cell migration	2019-03-25	346/18493	0.0110069	0.0440832	0.020627	PTGS2/GPI/VEGFA	3
BP	GO:0090132	epithelium migration	2019-03-25	349/18493	0.0112665	0.0450094	0.0210604	PTGS2/GPI/VEGFA	3
BP	GO:0034101	erythrocyte homeostasis	2019-02-25	120/18493	0.0113633	0.0451685	0.0211348	GPI/VEGFA	2
BP	GO:0038061	NIK/NF-kappaB signaling	2019-02-25	120/18493	0.0113633	0.0451685	0.0211348	MMP8/IL1B	2
BP	GO:0002687	positive regulation of leukocyte migration	2019-02-25	121/18493	0.0115448	0.045661	0.0213652	VEGFA/IL6	2
BP	GO:0045667	regulation of osteoblast differentiation	2019-02-25	121/18493	0.0115448	0.045661	0.0213652	IL6/LTF	2
BP	GO:0002460	adaptive immune response based on somatic recombination of immune receptors built from immunoglobulin superfamily domains	2019-03-25	354/18493	0.0117072	0.046188	0.0216118	ARG1/IL6/IL1B	3
BP	GO:0090130	tissue migration	2019-03-25	355/18493	0.0117965	0.0464249	0.0217227	PTGS2/GPI/VEGFA	3
BP	GO:0050715	positive regulation of cytokine secretion	2019-02-25	123/18493	0.0119116	0.0467619	0.0218803	MMP8/MMP12	2
BP	GO:0006913	nucleocytoplasmic transport	2019-03-25	357/18493	0.0119763	0.0468998	0.0219449	PTGS2/MMP12/IL1B	3
BP	GO:0051169	nuclear transport	2019-03-25	360/18493	0.012249	0.0476862	0.0223129	PTGS2/MMP12/IL1B	3
BP	GO:0032680	regulation of tumor necrosis factor production	2019-02-25	127/18493	0.0126605	0.0476862	0.0223129	MMP8/LTF	2
BP	GO:0045088	regulation of innate immune response	2019-03-25	365/18493	0.0127115	0.0476862	0.0223129	MMP12/ARG1/LTF	3
BP	GO:0002576	platelet degranulation	2019-02-25	128/18493	0.0128508	0.0476862	0.0223129	F13A1/VEGFA	2
BP	GO:0045598	regulation of fat cell differentiation	2019-02-25	128/18493	0.0128508	0.0476862	0.0223129	PTGS2/IL6	2
BP	GO:0060359	response to ammonium ion	2019-02-25	128/18493	0.0128508	0.0476862	0.0223129	CHRM3/GPI	2
BP	GO:0032640	tumor necrosis factor production	2019-02-25	129/18493	0.0130425	0.0476862	0.0223129	MMP8/LTF	2
BP	GO:0006631	fatty acid metabolic process	2019-03-25	369/18493	0.0130887	0.0476862	0.0223129	PTGS2/PTGS1/ALOX5	3
BP	GO:0006766	vitamin metabolic process	2019-02-25	130/18493	0.0132354	0.0476862	0.0223129	IL1B/MTR	2
BP	GO:0050921	positive regulation of chemotaxis	2019-02-25	130/18493	0.0132354	0.0476862	0.0223129	VEGFA/IL6	2
BP	GO:0071347	cellular response to interleukin-1	2019-02-25	130/18493	0.0132354	0.0476862	0.0223129	IL6/IL1B	2
BP	GO:0043900	regulation of multi-organism process	2019-03-25	371/18493	0.0132798	0.0476862	0.0223129	MMP12/ARG1/LTF	3
BP	GO:0002696	positive regulation of leukocyte activation	2019-03-25	372/18493	0.0133759	0.0476862	0.0223129	MMP8/IL6/IL1B	3
BP	GO:0007498	mesoderm development	2019-02-25	131/18493	0.0134295	0.0476862	0.0223129	GPI/VEGFA	2
BP	GO:0050777	negative regulation of immune response	2019-02-25	131/18493	0.0134295	0.0476862	0.0223129	MMP12/ARG1	2
BP	GO:1903555	regulation of tumor necrosis factor superfamily cytokine production	2019-02-25	131/18493	0.0134295	0.0476862	0.0223129	MMP8/LTF	2
BP	GO:0001820	serotonin secretion	2019-01-25	10/18493	0.0134399	0.0476862	0.0223129	SLC6A4	1
BP	GO:0010749	regulation of nitric oxide mediated signal transduction	2019-01-25	10/18493	0.0134399	0.0476862	0.0223129	VEGFA	1
BP	GO:0021924	cell proliferation in external granule layer	2019-01-25	10/18493	0.0134399	0.0476862	0.0223129	SLC6A4	1
BP	GO:0021930	cerebellar granule cell precursor proliferation	2019-01-25	10/18493	0.0134399	0.0476862	0.0223129	SLC6A4	1
BP	GO:0021936	regulation of cerebellar granule cell precursor proliferation	2019-01-25	10/18493	0.0134399	0.0476862	0.0223129	SLC6A4	1
BP	GO:0032306	regulation of prostaglandin secretion	2019-01-25	10/18493	0.0134399	0.0476862	0.0223129	IL1B	1
BP	GO:0032308	positive regulation of prostaglandin secretion	2019-01-25	10/18493	0.0134399	0.0476862	0.0223129	IL1B	1
BP	GO:0033148	positive regulation of intracellular estrogen receptor signaling pathway	2019-01-25	10/18493	0.0134399	0.0476862	0.0223129	AR	1
BP	GO:0033327	Leydig cell differentiation	2019-01-25	10/18493	0.0134399	0.0476862	0.0223129	AR	1
BP	GO:0033690	positive regulation of osteoblast proliferation	2019-01-25	10/18493	0.0134399	0.0476862	0.0223129	LTF	1
BP	GO:0034145	positive regulation of toll-like receptor 4 signaling pathway	2019-01-25	10/18493	0.0134399	0.0476862	0.0223129	LTF	1
BP	GO:0044793	negative regulation by host of viral process	2019-01-25	10/18493	0.0134399	0.0476862	0.0223129	LTF	1
BP	GO:0045073	regulation of chemokine biosynthetic process	2019-01-25	10/18493	0.0134399	0.0476862	0.0223129	IL6	1
BP	GO:0046886	positive regulation of hormone biosynthetic process	2019-01-25	10/18493	0.0134399	0.0476862	0.0223129	IL1B	1
BP	GO:0051673	membrane disruption in other organism	2019-01-25	10/18493	0.0134399	0.0476862	0.0223129	LTF	1
BP	GO:0060339	negative regulation of type I interferon-mediated signaling pathway	2019-01-25	10/18493	0.0134399	0.0476862	0.0223129	MMP12	1
BP	GO:0060352	cell adhesion molecule production	2019-01-25	10/18493	0.0134399	0.0476862	0.0223129	IL1B	1
BP	GO:0060513	prostatic bud formation	2019-01-25	10/18493	0.0134399	0.0476862	0.0223129	AR	1
BP	GO:0060736	prostate gland growth	2019-01-25	10/18493	0.0134399	0.0476862	0.0223129	AR	1
BP	GO:0060768	regulation of epithelial cell proliferation involved in prostate gland development	2019-01-25	10/18493	0.0134399	0.0476862	0.0223129	AR	1
BP	GO:0070091	glucagon secretion	2019-01-25	10/18493	0.0134399	0.0476862	0.0223129	IL6	1
BP	GO:0070942	neutrophil mediated cytotoxicity	2019-01-25	10/18493	0.0134399	0.0476862	0.0223129	ARG1	1
BP	GO:0072641	type I interferon secretion	2019-01-25	10/18493	0.0134399	0.0476862	0.0223129	MMP12	1
BP	GO:0090336	positive regulation of brown fat cell differentiation	2019-01-25	10/18493	0.0134399	0.0476862	0.0223129	PTGS2	1
BP	GO:0097050	type B pancreatic cell apoptotic process	2019-01-25	10/18493	0.0134399	0.0476862	0.0223129	IL6	1
BP	GO:0150065	regulation of deacetylase activity	2019-01-25	10/18493	0.0134399	0.0476862	0.0223129	VEGFA	1
BP	GO:0050671	positive regulation of lymphocyte proliferation	2019-02-25	132/18493	0.0136249	0.0482347	0.0225695	IL6/IL1B	2
BP	GO:0032946	positive regulation of mononuclear cell proliferation	2019-02-25	133/18493	0.0138216	0.0488218	0.0228442	IL6/IL1B	2
BP	GO:0007292	female gamete generation	2019-02-25	134/18493	0.0140194	0.0493012	0.0230685	PTGS2/PGR	2
BP	GO:1905330	regulation of morphogenesis of an epithelium	2019-02-25	134/18493	0.0140194	0.0493012	0.0230685	VEGFA/AR	2
BP	GO:0071706	tumor necrosis factor superfamily cytokine production	2019-02-25	135/18493	0.0142186	0.0495394	0.02318	MMP8/LTF	2
BP	GO:0009411	response to UV	2019-02-25	136/18493	0.0144189	0.0495394	0.02318	PTGS2/CAT	2
BP	GO:0050867	positive regulation of cell activation	2019-03-25	384/18493	0.0145606	0.0495394	0.02318	MMP8/IL6/IL1B	3
BP	GO:0000050	urea cycle	2019-01-25	11/18493	0.0147744	0.0495394	0.02318	ARG1	1
BP	GO:0010269	response to selenium ion	2019-01-25	11/18493	0.0147744	0.0495394	0.02318	ARG1	1
BP	GO:0018065	protein-cofactor linkage	2019-01-25	11/18493	0.0147744	0.0495394	0.02318	CTH	1
BP	GO:0021534	cell proliferation in hindbrain	2019-01-25	11/18493	0.0147744	0.0495394	0.02318	SLC6A4	1
BP	GO:0032494	response to peptidoglycan	2019-01-25	11/18493	0.0147744	0.0495394	0.02318	IL6	1
BP	GO:0035630	bone mineralization involved in bone maturation	2019-01-25	11/18493	0.0147744	0.0495394	0.02318	LTF	1
BP	GO:0042033	chemokine biosynthetic process	2019-01-25	11/18493	0.0147744	0.0495394	0.02318	IL6	1
BP	GO:0042368	vitamin D biosynthetic process	2019-01-25	11/18493	0.0147744	0.0495394	0.02318	IL1B	1
BP	GO:0043129	surfactant homeostasis	2019-01-25	11/18493	0.0147744	0.0495394	0.02318	VEGFA	1
BP	GO:0045945	positive regulation of transcription by RNA polymerase III	2019-01-25	11/18493	0.0147744	0.0495394	0.02318	AR	1
BP	GO:0046007	negative regulation of activated T cell proliferation	2019-01-25	11/18493	0.0147744	0.0495394	0.02318	ARG1	1
BP	GO:0046185	aldehyde catabolic process	2019-01-25	11/18493	0.0147744	0.0495394	0.02318	GPI	1
BP	GO:0050755	chemokine metabolic process	2019-01-25	11/18493	0.0147744	0.0495394	0.02318	IL6	1
BP	GO:0060340	positive regulation of type I interferon-mediated signaling pathway	2019-01-25	11/18493	0.0147744	0.0495394	0.02318	MMP12	1
BP	GO:0060767	epithelial cell proliferation involved in prostate gland development	2019-01-25	11/18493	0.0147744	0.0495394	0.02318	AR	1
BP	GO:0060947	cardiac vascular smooth muscle cell differentiation	2019-01-25	11/18493	0.0147744	0.0495394	0.02318	VEGFA	1
BP	GO:0070673	response to interleukin-18	2019-01-25	11/18493	0.0147744	0.0495394	0.02318	ALOX5	1
BP	GO:0071639	positive regulation of monocyte chemotactic protein-1 production	2019-01-25	11/18493	0.0147744	0.0495394	0.02318	IL1B	1
BP	GO:1903011	negative regulation of bone development	2019-01-25	11/18493	0.0147744	0.0495394	0.02318	LTF	1
BP	GO:0045834	positive regulation of lipid metabolic process	2019-02-25	138/18493	0.0148233	0.0495987	0.0232077	PTGS2/IL1B	2
BP	GO:0022407	regulation of cell-cell adhesion	2019-03-25	388/18493	0.0149685	0.0499652	0.0233792	ARG1/IL6/IL1B	3
BP	GO:0031056	regulation of histone modification	2019-02-25	139/18493	0.0150274	0.0499652	0.0233792	VEGFA/IL1B	2
BP	GO:0070665	positive regulation of leukocyte proliferation	2019-02-25	139/18493	0.0150274	0.0499652	0.0233792	IL6/IL1B	2
CC	GO:0034774	secretory granule lumen	2019-09-25	321/19659	1.19804e-10	5.89486e-09	3.88672e-09	LYZ/MMP8/ARG1/CAT/F13A1/GPI/VEGFA/LTF/ALOX5	9
CC	GO:0060205	cytoplasmic vesicle lumen	2019-09-25	338/19659	1.89317e-10	5.89486e-09	3.88672e-09	LYZ/MMP8/ARG1/CAT/F13A1/GPI/VEGFA/LTF/ALOX5	9
CC	GO:0031983	vesicle lumen	2019-09-25	339/19659	1.94336e-10	5.89486e-09	3.88672e-09	LYZ/MMP8/ARG1/CAT/F13A1/GPI/VEGFA/LTF/ALOX5	9
CC	GO:0035580	specific granule lumen	2019-04-25	62/19659	1.07934e-06	2.4555e-05	1.61901e-05	LYZ/MMP8/ARG1/LTF	4
CC	GO:1904724	tertiary granule lumen	2019-03-25	55/19659	4.56231e-05	0.000709545	0.000467832	LYZ/MMP8/LTF	3
CC	GO:0042581	specific granule	2019-04-25	160/19659	4.67832e-05	0.000709545	0.000467832	LYZ/MMP8/ARG1/LTF	4
CC	GO:1904813	ficolin-1-rich granule lumen	2019-03-25	124/19659	0.000508989	0.00661686	0.00436276	CAT/GPI/ALOX5	3
CC	GO:0070820	tertiary granule	2019-03-25	164/19659	0.00114555	0.0130306	0.00859162	LYZ/MMP8/LTF	3
CC	GO:0101002	ficolin-1-rich granule	2019-03-25	185/19659	0.00161909	0.0163708	0.0107939	CAT/GPI/ALOX5	3
CC	GO:0031012	extracellular matrix	2019-04-25	490/19659	0.00318221	0.0269961	0.0177997	MMP8/MMP12/F13A1/VEGFA	4
CC	GO:0031093	platelet alpha granule lumen	2019-02-25	67/19659	0.00326327	0.0269961	0.0177997	F13A1/VEGFA	2
CC	GO:0099056	integral component of presynaptic membrane	2019-02-25	75/19659	0.00407031	0.0308665	0.0203515	CHRM3/SLC6A4	2
CC	GO:0098889	intrinsic component of presynaptic membrane	2019-02-25	84/19659	0.00507757	0.0333915	0.0220164	CHRM3/SLC6A4	2
CC	GO:0031970	organelle envelope lumen	2019-02-25	85/19659	0.00519588	0.0333915	0.0220164	CAT/ALOX5	2
CC	GO:0031091	platelet alpha granule	2019-02-25	91/19659	0.00593229	0.0333915	0.0220164	F13A1/VEGFA	2
CC	GO:0035578	azurophil granule lumen	2019-02-25	91/19659	0.00593229	0.0333915	0.0220164	LYZ/ARG1	2
CC	GO:0045121	membrane raft	2019-03-25	304/19659	0.00654541	0.0333915	0.0220164	PTGS2/LDHB/SLC6A4	3
CC	GO:0098857	membrane microdomain	2019-03-25	305/19659	0.00660491	0.0333915	0.0220164	PTGS2/LDHB/SLC6A4	3
CC	GO:0098589	membrane region	2019-03-25	316/19659	0.00728096	0.034872	0.0229925	PTGS2/LDHB/SLC6A4	3
CC	GO:0099055	integral component of postsynaptic membrane	2019-02-25	117/19659	0.00963441	0.0438366	0.0289032	CHRM3/SLC6A4	2
CC	GO:0098936	intrinsic component of postsynaptic membrane	2019-02-25	122/19659	0.0104386	0.0452341	0.0298247	CHRM3/SLC6A4	2
MF	GO:0048037	cofactor binding	2019-08-25	495/17632	2.58987e-07	4.0143e-05	2.15368e-05	PTGS2/PTGS1/CAT/GPT/CTH/ALDH2/MTR/GLUD1	8
MF	GO:0050662	coenzyme binding	2019-05-25	285/17632	4.34126e-05	0.00205901	0.00110467	CAT/GPT/CTH/ALDH2/GLUD1	5
MF	GO:0046906	tetrapyrrole binding	2019-04-25	141/17632	4.35026e-05	0.00205901	0.00110467	PTGS2/PTGS1/CAT/MTR	4
MF	GO:0004601	peroxidase activity	2019-03-25	52/17632	5.31523e-05	0.00205901	0.00110467	PTGS2/PTGS1/CAT	3
MF	GO:0016684	oxidoreductase activity, acting on peroxide as acceptor	2019-03-25	56/17632	6.64198e-05	0.00205901	0.00110467	PTGS2/PTGS1/CAT	3
MF	GO:0016209	antioxidant activity	2019-03-25	86/17632	0.000238432	0.0052843	0.00283504	PTGS2/PTGS1/CAT	3
MF	GO:0005125	cytokine activity	2019-04-25	219/17632	0.000238646	0.0052843	0.00283504	GPI/VEGFA/IL6/IL1B	4
MF	GO:0051213	dioxygenase activity	2019-03-25	92/17632	0.00029094	0.00563696	0.00302424	PTGS2/PTGS1/ALOX5	3
MF	GO:0016702	oxidoreductase activity, acting on single donors with incorporation of molecular oxygen, incorporation of two atoms of oxygen	2019-02-25	27/17632	0.000662888	0.0108003	0.00579439	PTGS2/ALOX5	2
MF	GO:0016701	oxidoreductase activity, acting on single donors with incorporation of molecular oxygen	2019-02-25	28/17632	0.00071326	0.0108003	0.00579439	PTGS2/ALOX5	2
MF	GO:0020037	heme binding	2019-03-25	131/17632	0.000817913	0.0108003	0.00579439	PTGS2/PTGS1/CAT	3
MF	GO:0070851	growth factor receptor binding	2019-03-25	132/17632	0.000836153	0.0108003	0.00579439	VEGFA/IL6/IL1B	3
MF	GO:0019842	vitamin binding	2019-03-25	139/17632	0.000971118	0.0115787	0.00621201	GPT/CTH/MTR	3
MF	GO:0008083	growth factor activity	2019-03-25	166/17632	0.00161862	0.0179204	0.00961434	GPI/VEGFA/IL6	3
MF	GO:0004879	nuclear receptor activity	2019-02-25	50/17632	0.00226777	0.0202031	0.010839	PGR/AR	2
MF	GO:0098531	transcription factor activity, direct ligand regulated sequence-specific DNA binding	2019-02-25	50/17632	0.00226777	0.0202031	0.010839	PGR/AR	2
MF	GO:0003707	steroid hormone receptor activity	2019-02-25	54/17632	0.00263995	0.0202031	0.010839	PGR/AR	2
MF	GO:0030170	pyridoxal phosphate binding	2019-02-25	54/17632	0.00263995	0.0202031	0.010839	GPT/CTH	2
MF	GO:0070279	vitamin B6 binding	2019-02-25	54/17632	0.00263995	0.0202031	0.010839	GPT/CTH	2
MF	GO:0042165	neurotransmitter binding	2019-02-25	55/17632	0.0027372	0.0202031	0.010839	CHRM3/SLC6A4	2
MF	GO:0051287	NAD binding	2019-02-25	55/17632	0.0027372	0.0202031	0.010839	ALDH2/GLUD1	2
MF	GO:0048018	receptor ligand activity	2019-04-25	478/17632	0.00429291	0.0302455	0.0162268	GPI/VEGFA/IL6/IL1B	4
MF	GO:0070405	ammonium ion binding	2019-02-25	74/17632	0.00489728	0.0330034	0.0177064	CHRM3/SLC6A4	2
MF	GO:0004252	serine-type endopeptidase activity	2019-03-25	250/17632	0.00514369	0.0332197	0.0178224	MMP8/MMP12/LTF	3
MF	GO:0051117	ATPase binding	2019-02-25	80/17632	0.00569982	0.0353389	0.0189594	PGR/AR	2
MF	GO:0008236	serine-type peptidase activity	2019-03-25	273/17632	0.00656266	0.0379792	0.0203759	MMP8/MMP12/LTF	3
MF	GO:0017171	serine hydrolase activity	2019-03-25	277/17632	0.00683098	0.0379792	0.0203759	MMP8/MMP12/LTF	3
MF	GO:0005496	steroid binding	2019-02-25	89/17632	0.00700866	0.0379792	0.0203759	PGR/AR	2
MF	GO:0005126	cytokine receptor binding	2019-03-25	281/17632	0.00710579	0.0379792	0.0203759	VEGFA/IL6/IL1B	3
MF	GO:0042562	hormone binding	2019-02-25	104/17632	0.00946239	0.048889	0.0262291	CHRM3/AR	2
